# Supplementary material for: Tissue-Specific Expression of TIGIT, PD-1, TIM-3, and CD39 by γδ T Cells in Ovarian Cancer
Source: MDPI journal article supplement (doi:10.3390/cells11060964), 2022-03-11
Supplement: s1 [file s1]

| Patients for analysis | OvCA PBL<br>N <sub>total</sub> =17 | OvCA MAL<br>N <sub>total</sub> =18 | OvCA TIL<br>N <sub>total</sub> =9 | HD PBL<br>N <sub>total</sub> =14 |
|-----------------------|------------------------------------|------------------------------------|-----------------------------------|----------------------------------|
| Age                   |                                    |                                    |                                   |                                  |
| Median (range)        | 60 (32-86)                         | 61 (32-86)                         | 57 (32-66)                        | 59 (26-64)                       |
| Sex                   | All female                         | All female                         | All female                        | All female                       |

**Table S1: Patient characteristics of patients included in the study.**  
Age and sex of the donors included in the study are depicted. The cohort included peripheral blood (PBL), malignant ascites (MAL) and tumor-infiltrating lymphocytes (TIL) of patients with ovarian cancer (OvCA) as well as PBL from healthy volunteers (HD).

| Patient | Diagnosis | FIGO stage | Lymph node metastasis | Meta-stasis | pT stage | Residual tumor after surgery | Primary/Recurrent | Material        |
|---------|-----------|------------|-----------------------|-------------|----------|------------------------------|-------------------|-----------------|
| Pat#1   | HGSOC     | IIIC       | N1                    | M0          | pT2a     | > 1cm                        | primary           | PBL, MAL        |
| Pat#2   | HGSOC     | IIIC       | N1                    | M0          | pT3c     | microscopic                  | recurrent         | PBL, MAL        |
| Pat#3   | HGSOC     | IVb        | N1                    | M1          | pT3c     | > 1cm                        | primary           | PBL, MAL        |
| Pat#4   | HGSOC     | III        | N1                    | M0          | pT3c     | < 1cm                        | primary           | PBL*, MAL       |
| Pat#5   | HGSOC     | IIIC       | Nx                    | M0          | pT3b     | < 1cm                        | primary           | PBL, MAL        |
| Pat#6   | HGSOC     | IIIC       | N1                    | M0          | pT3c     | < 1cm                        | primary           | PBL, MAL        |
| Pat#7   | HGSOC     | IIIC       | N0                    | M0          | pT3c     | microscopic                  | primary           | PBL, MAL        |
| Pat#8   | HGSOC     | IV         | N1                    | M1          | pT3c     | <1 cm                        | primary           | PBL, MAL        |
| Pat#9   | HGSOC     | IIIC       | N0                    | M0          | pT3c     | microscopic                  | primary           | PBL, MAL, TIL   |
| Pat#10  | HGSOC     | IIIC       | N1                    | M0          | pT3c     | microscopic                  | primary           | PBL, MAL, TIL   |
| Pat#11  | HGSOC     | IIIC       | N1                    | M0          | pT3c     | microscopic                  | recurrent         | PBL, MAL, TIL   |
| Pat#12  | HGSOC     | IIIC       | N1                    | M0          | pT3c     | <1 cm                        | primary           | PBL*, MAL*, TIL |
| Pat#13  | HGSOC     | IIIC       | Nx                    | M0          | pT3c     | > 1cm                        | primary           | PBL*, MAL*, TIL |
| Pat#14  | HGSOC     | IIIC       | N1                    | M0          | pT3c     | microscopic                  | primary           | PBL, MAL, TIL   |
| Pat#15  | HGSOC     | IV         | N0                    | M1          | pT3c     | < 1cm                        | primary           | PBL, MAL, TIL   |
| Pat#16  | HGSOC     | IIIC       | N0                    | M0          | pT3c     | 1 cm                         | primary           | PBL, MAL, TIL   |
| Pat#17  | HGSOC     | IIIC       | N0                    | M0          | pT3c     | > 1cm                        | primary           | PBL, MAL, TIL   |
| Pat#18  | HGSOC     | IIIC       | N1                    | M0          | pT3c     | microscopic                  | primary           | PBL, MAL, TIL   |

\* Material has been excluded for checkpoint analyses from the study .

**Table S2: Clinical characteristics of patients included in the study.**  
Clinical data such as diagnosis (HGSOC = high grade serous ovarian cancer), FIGO stage, TNM characteristics, tumor residual after surgery, tumor status (primary/recurrent) and material aquired are depicted in this table.

| Antibody     | Clone     |
|--------------|-----------|
| anti-CD3     | OKT3      |
| anti-CD4     | RPA T4    |
| anti-CD8     | RPA T8    |
| anti-EPCAM   | 9C4       |
| anti-γδ TCR  | B1        |
| anti-Vδ1 TCR | REA173    |
| anti-Vδ2 TCR | REA771    |
| anti-CD45RA  | HI100     |
| anti-CD27    | O323      |
| anti-CD19    | HIB19     |
| anti-CD56    | HCD56     |
| anti-PD-1    | EH12.2H7  |
| anti-TIGIT   | A15153G   |
| anti-TIM-3   | F38-2E2   |
| anti-CD39    | A1        |
| anti-CD73    | AD2       |
| anti-Ox40    | Ber-ACT35 |

**Table S3: Antibodies and clones used in the study.**  
Applied antibodies with their respective clones are depicted in this table.

**A)**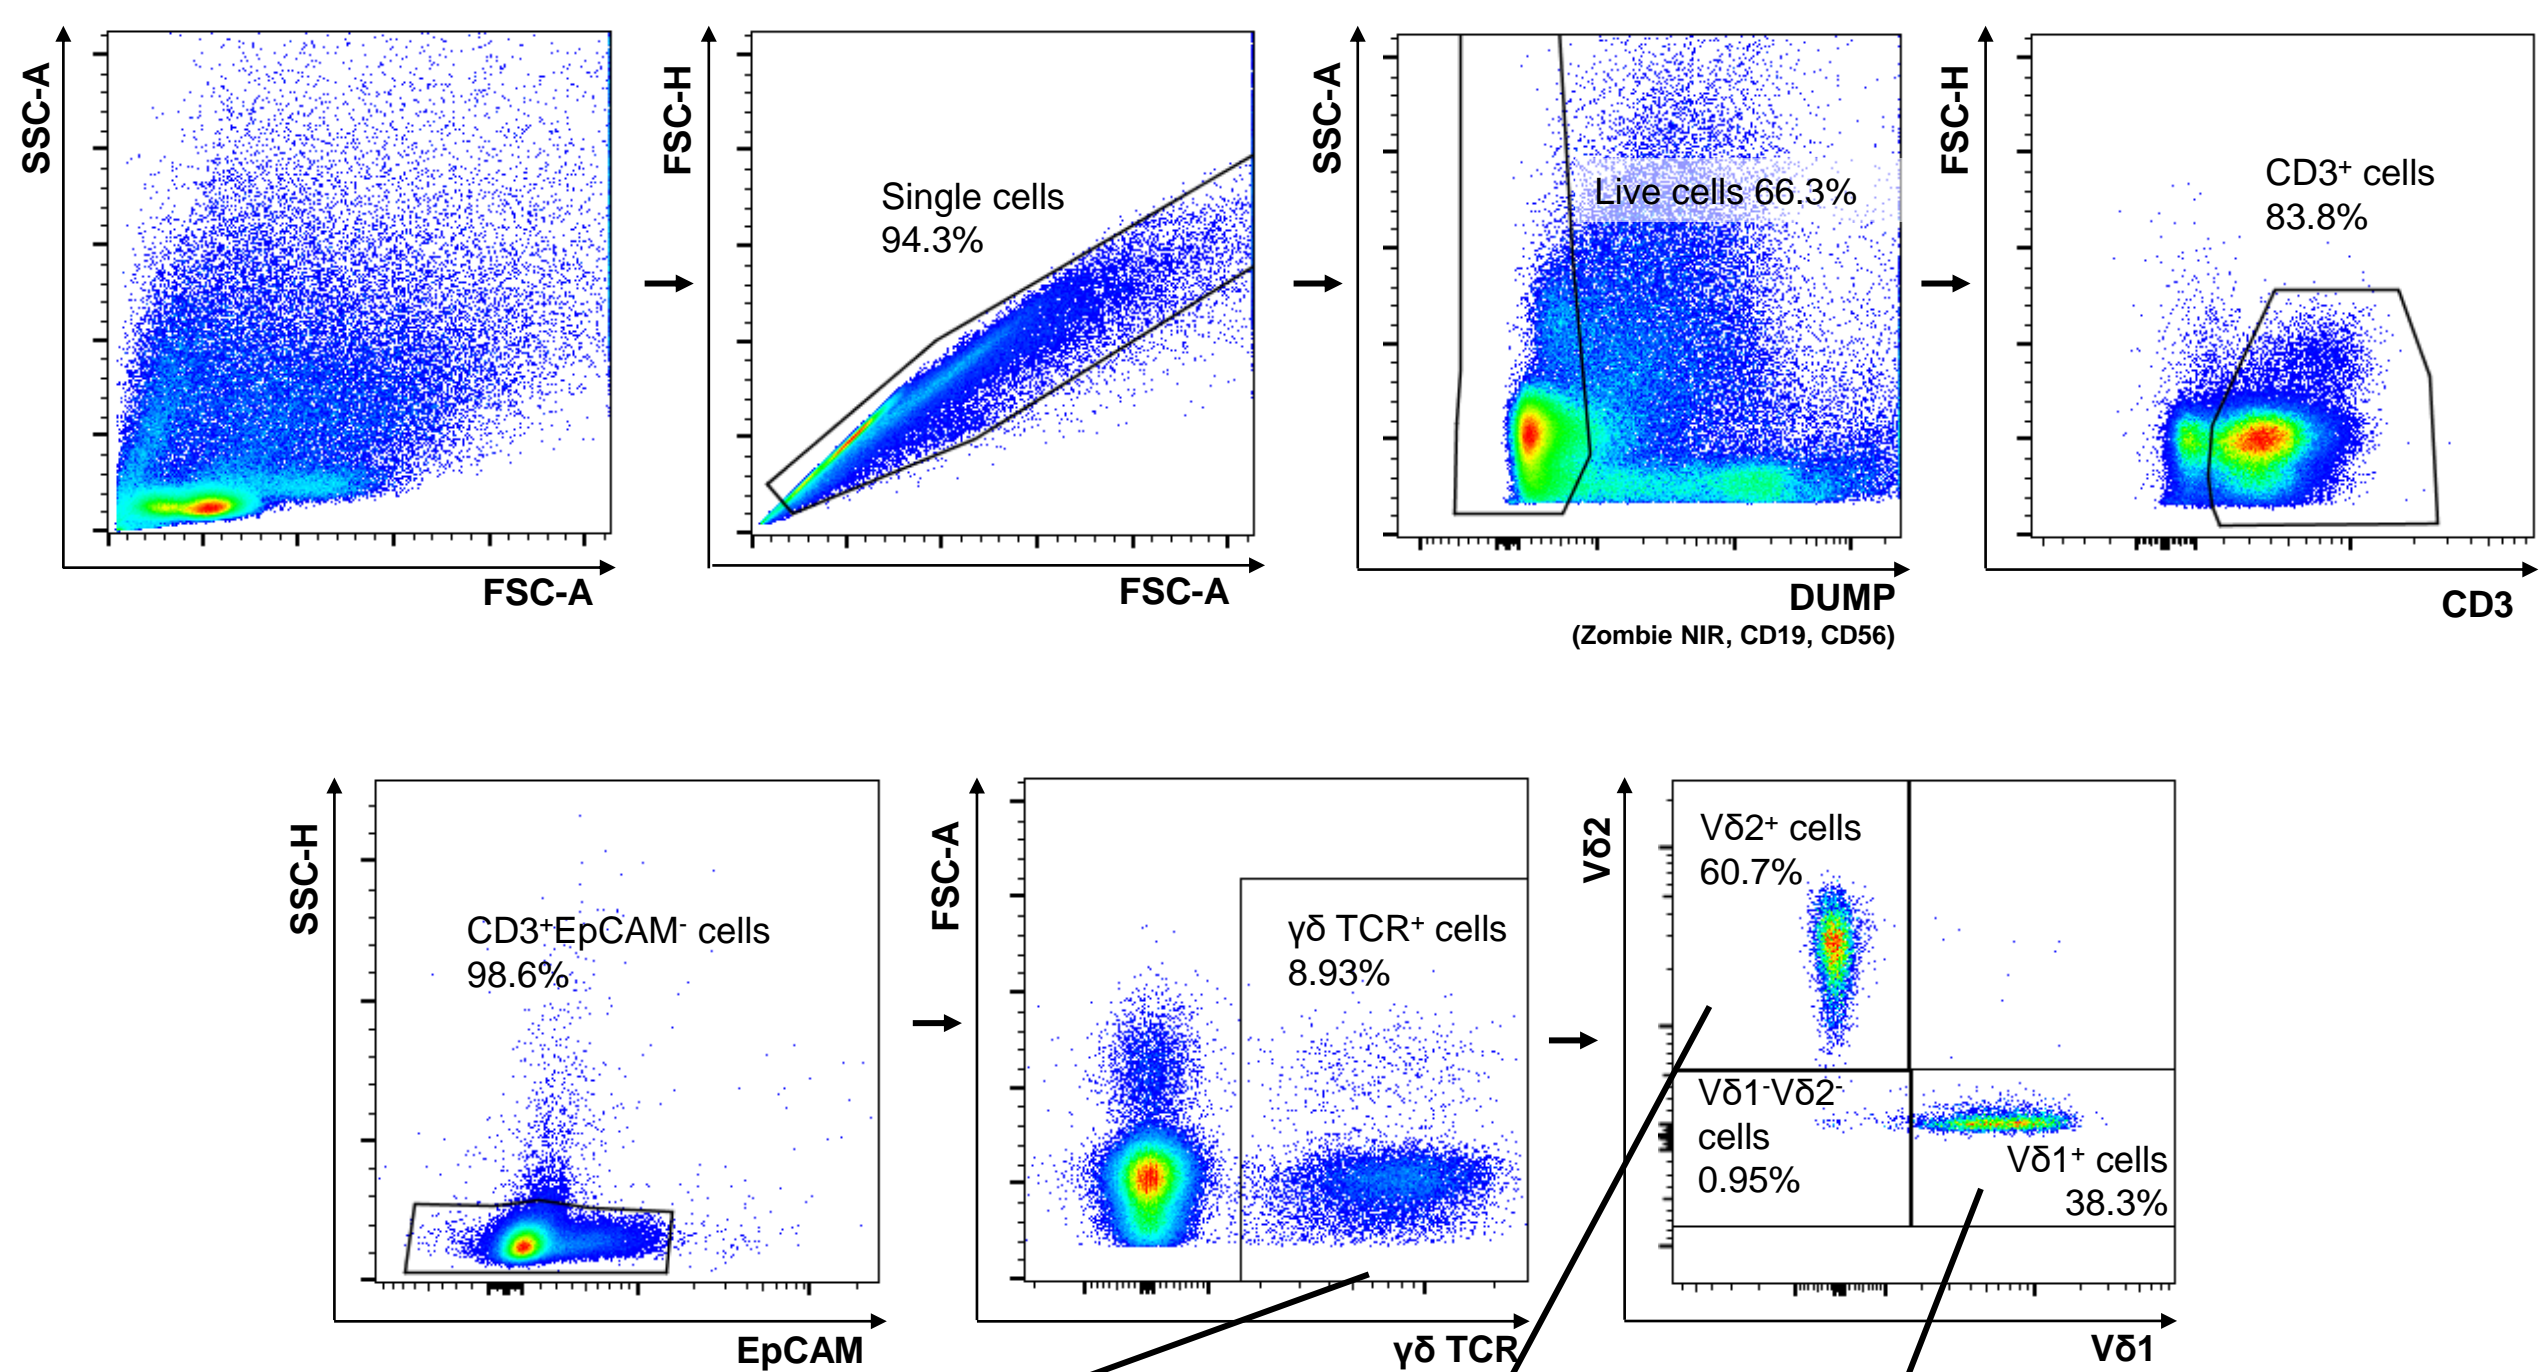**B)**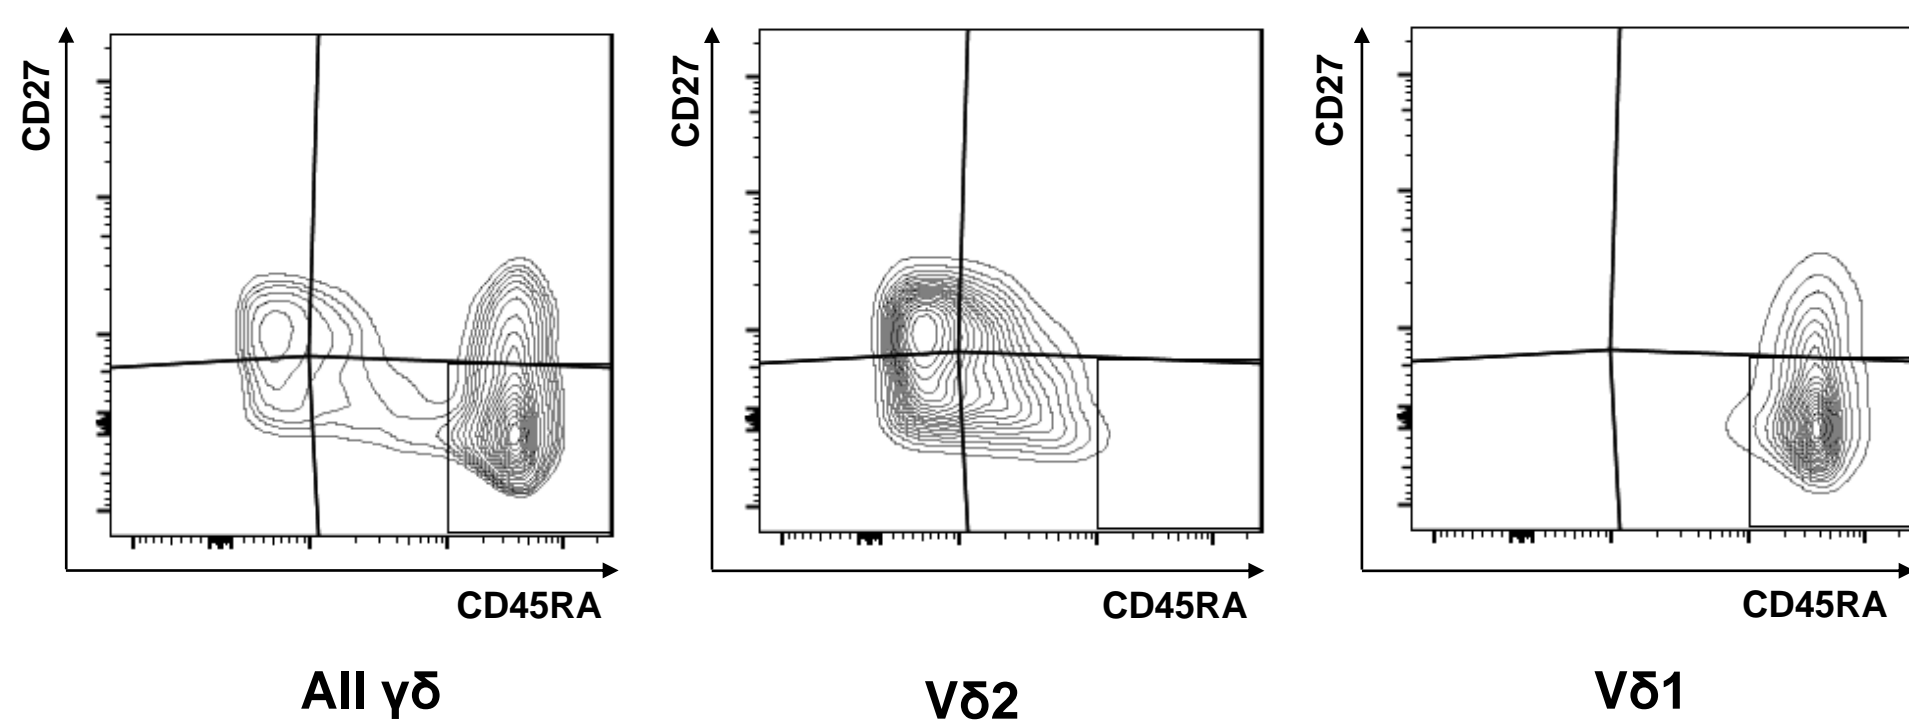

**Figure S1: Flow cytometry gating strategy to identify (Vδ1 and Vδ2) γδ T cells.** Peripheral blood- (PB) and malignant ascites- (MA) derived mononuclear cells and tumor infiltrating lymphocytes (TIL) were analyzed via the same gating strategy. For each sample, one FACS tube was stained according to the gating strategy listed below, as well as fluorescence minus one (FMO) controls for the single molecules. **(A)** After exclusion of doublets and cell debris, the living cells of interest were isolated via DUMP-negative gating. The DUMP channel included Zombie NIR, CD19 and CD56 in all tubes. The DUMP-gating excluded B-lymphocytes and NK cells together with the dead cells. Next, CD3<sup>+</sup> T cells were gated on, followed by an exclusion of EpCAM<sup>+</sup> ovarian cancer cells. After isolating the γδ T cells, this population was further divided into the Vδ1 and Vδ2 γδ T cell subpopulation regarding the expression of the corresponding receptors. **(B)** Gating of the differentiation markers CD27 and CD45RA on all γδ T cells (left), Vδ1 (middle) and Vδ2 cells (right).



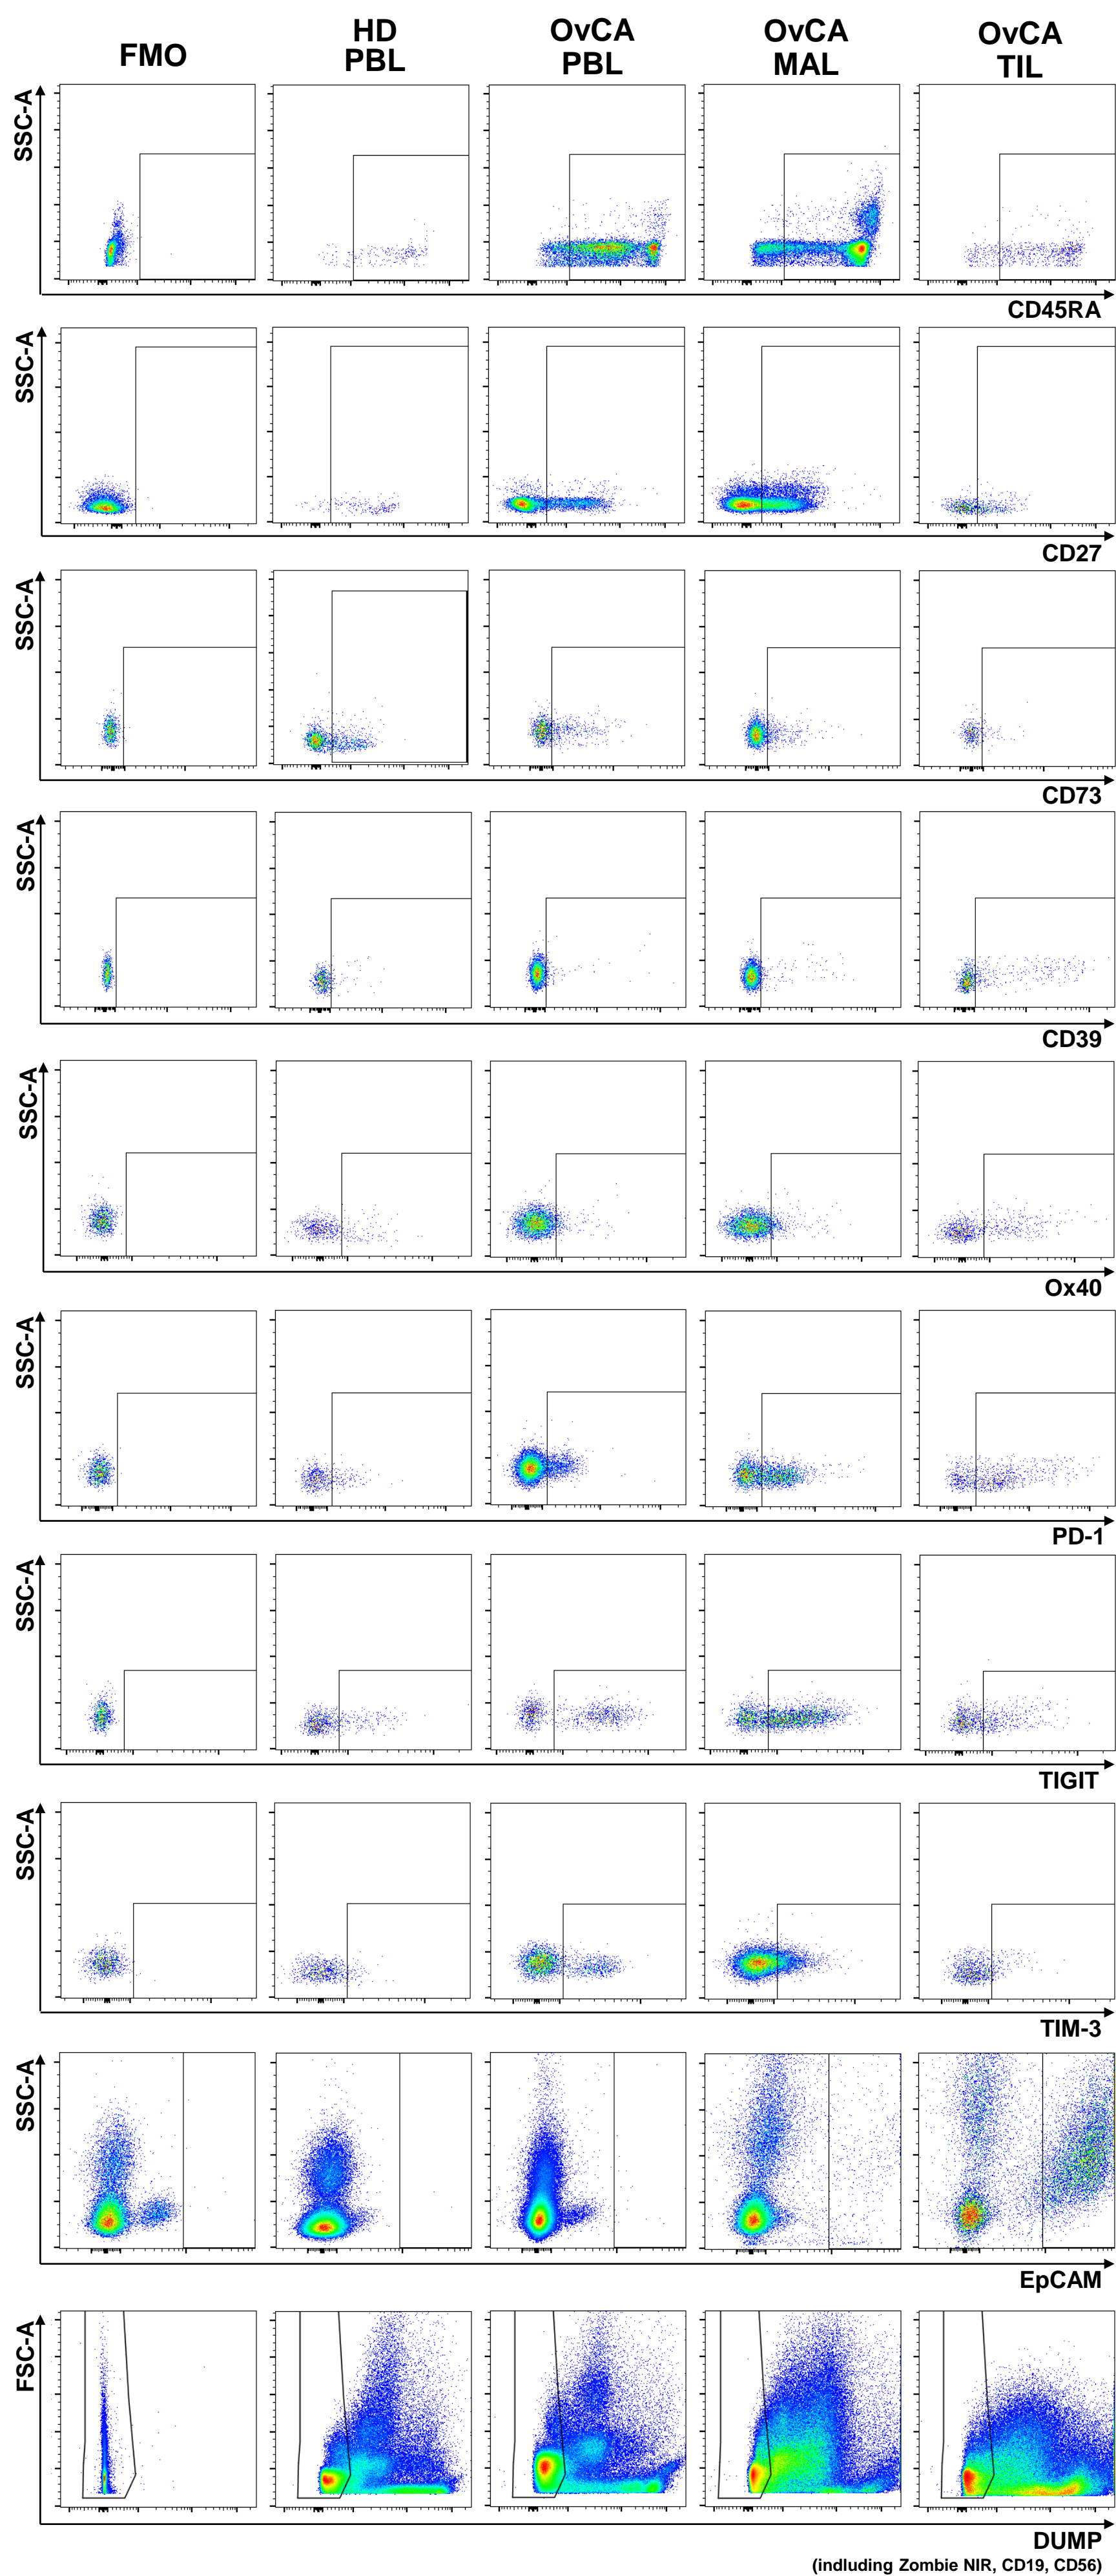

(including Zombie NIR, CD19, CD56)

**Figure S2: Fluorescence minus one (FMO) flow cytometry data to identify positive expression.** DUMP-gating, differentiation and expression of ectonucleotidases, activation markers and co-inhibitory receptors (second to left panel: peripheral blood (PB) from healthy donors (HD), middle panel: PB from ovarian cancer (OvCA) patients; second to right panel: malignant ascites (MA) from OvCA patients, right panel: tumor-infiltrating lymphocytes (TIL) from OvCA patients) were gated with contemplation of FMOs (left panel), identifying the cutoff of positive expression.

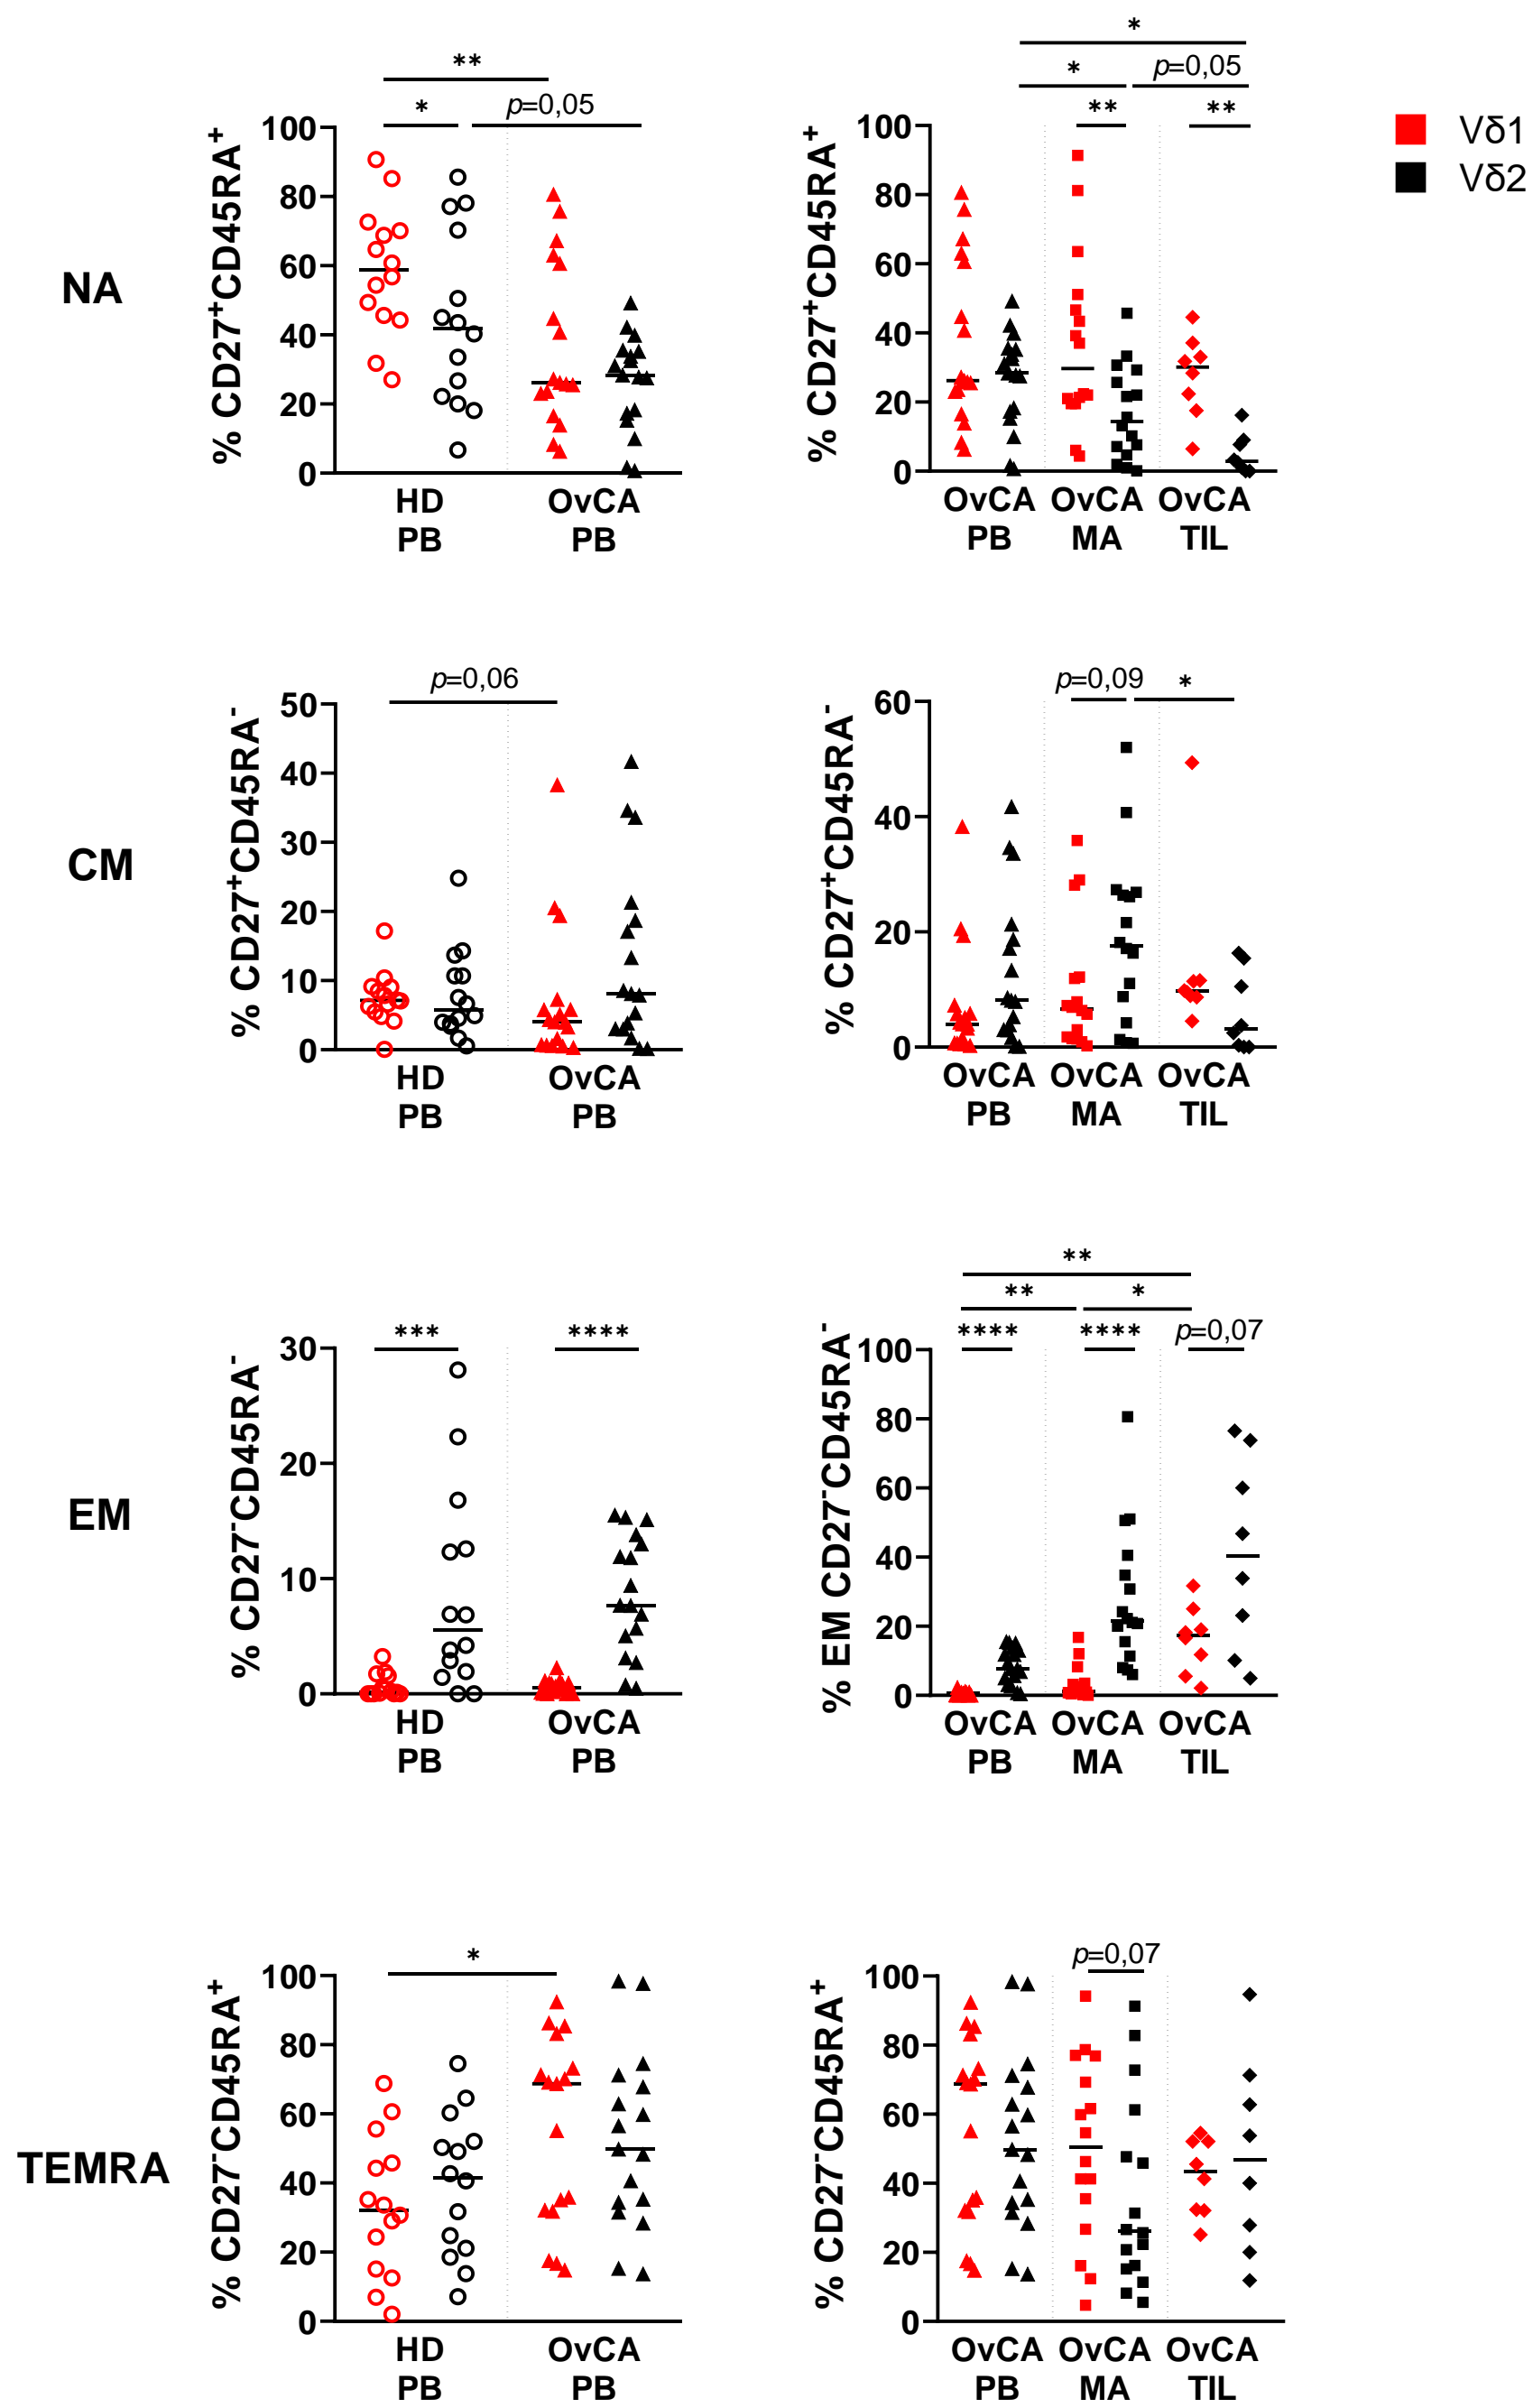

**Figure S3: Differentiation status of  $\gamma\delta$  T cells.**

The differentiation of Vδ1 (red) and Vδ2 (black) T cells into the naive (NA, CD27<sup>+</sup>CD45RA<sup>+</sup>) central memory (CM, CD27<sup>+</sup>CD45RA<sup>-</sup>), effector memory (EM, CD27<sup>-</sup>CD45RA<sup>-</sup>) and terminally differentiated effector memory (TEMRA, CD27<sup>-</sup>CD45RA<sup>+</sup>) cells was compared between the peripheral blood (PB) of healthy donors (HD; circles, n=14) and the PB of ovarian cancer (OvCA) patients (triangles, n=17), as well as between PB, malignant ascites (MA, squares, n=16) and tumor-infiltrating lymphocytes (TIL, diamonds, n=8) of OvCA patients. *P* values were obtained by the Mann-Whitney-Test and Wilcoxon matched-pairs signed-rank test. \**P*<0.05, \*\**P*<0.01, \*\*\**P*<0.001, \*\*\*\**P*<0.0001.

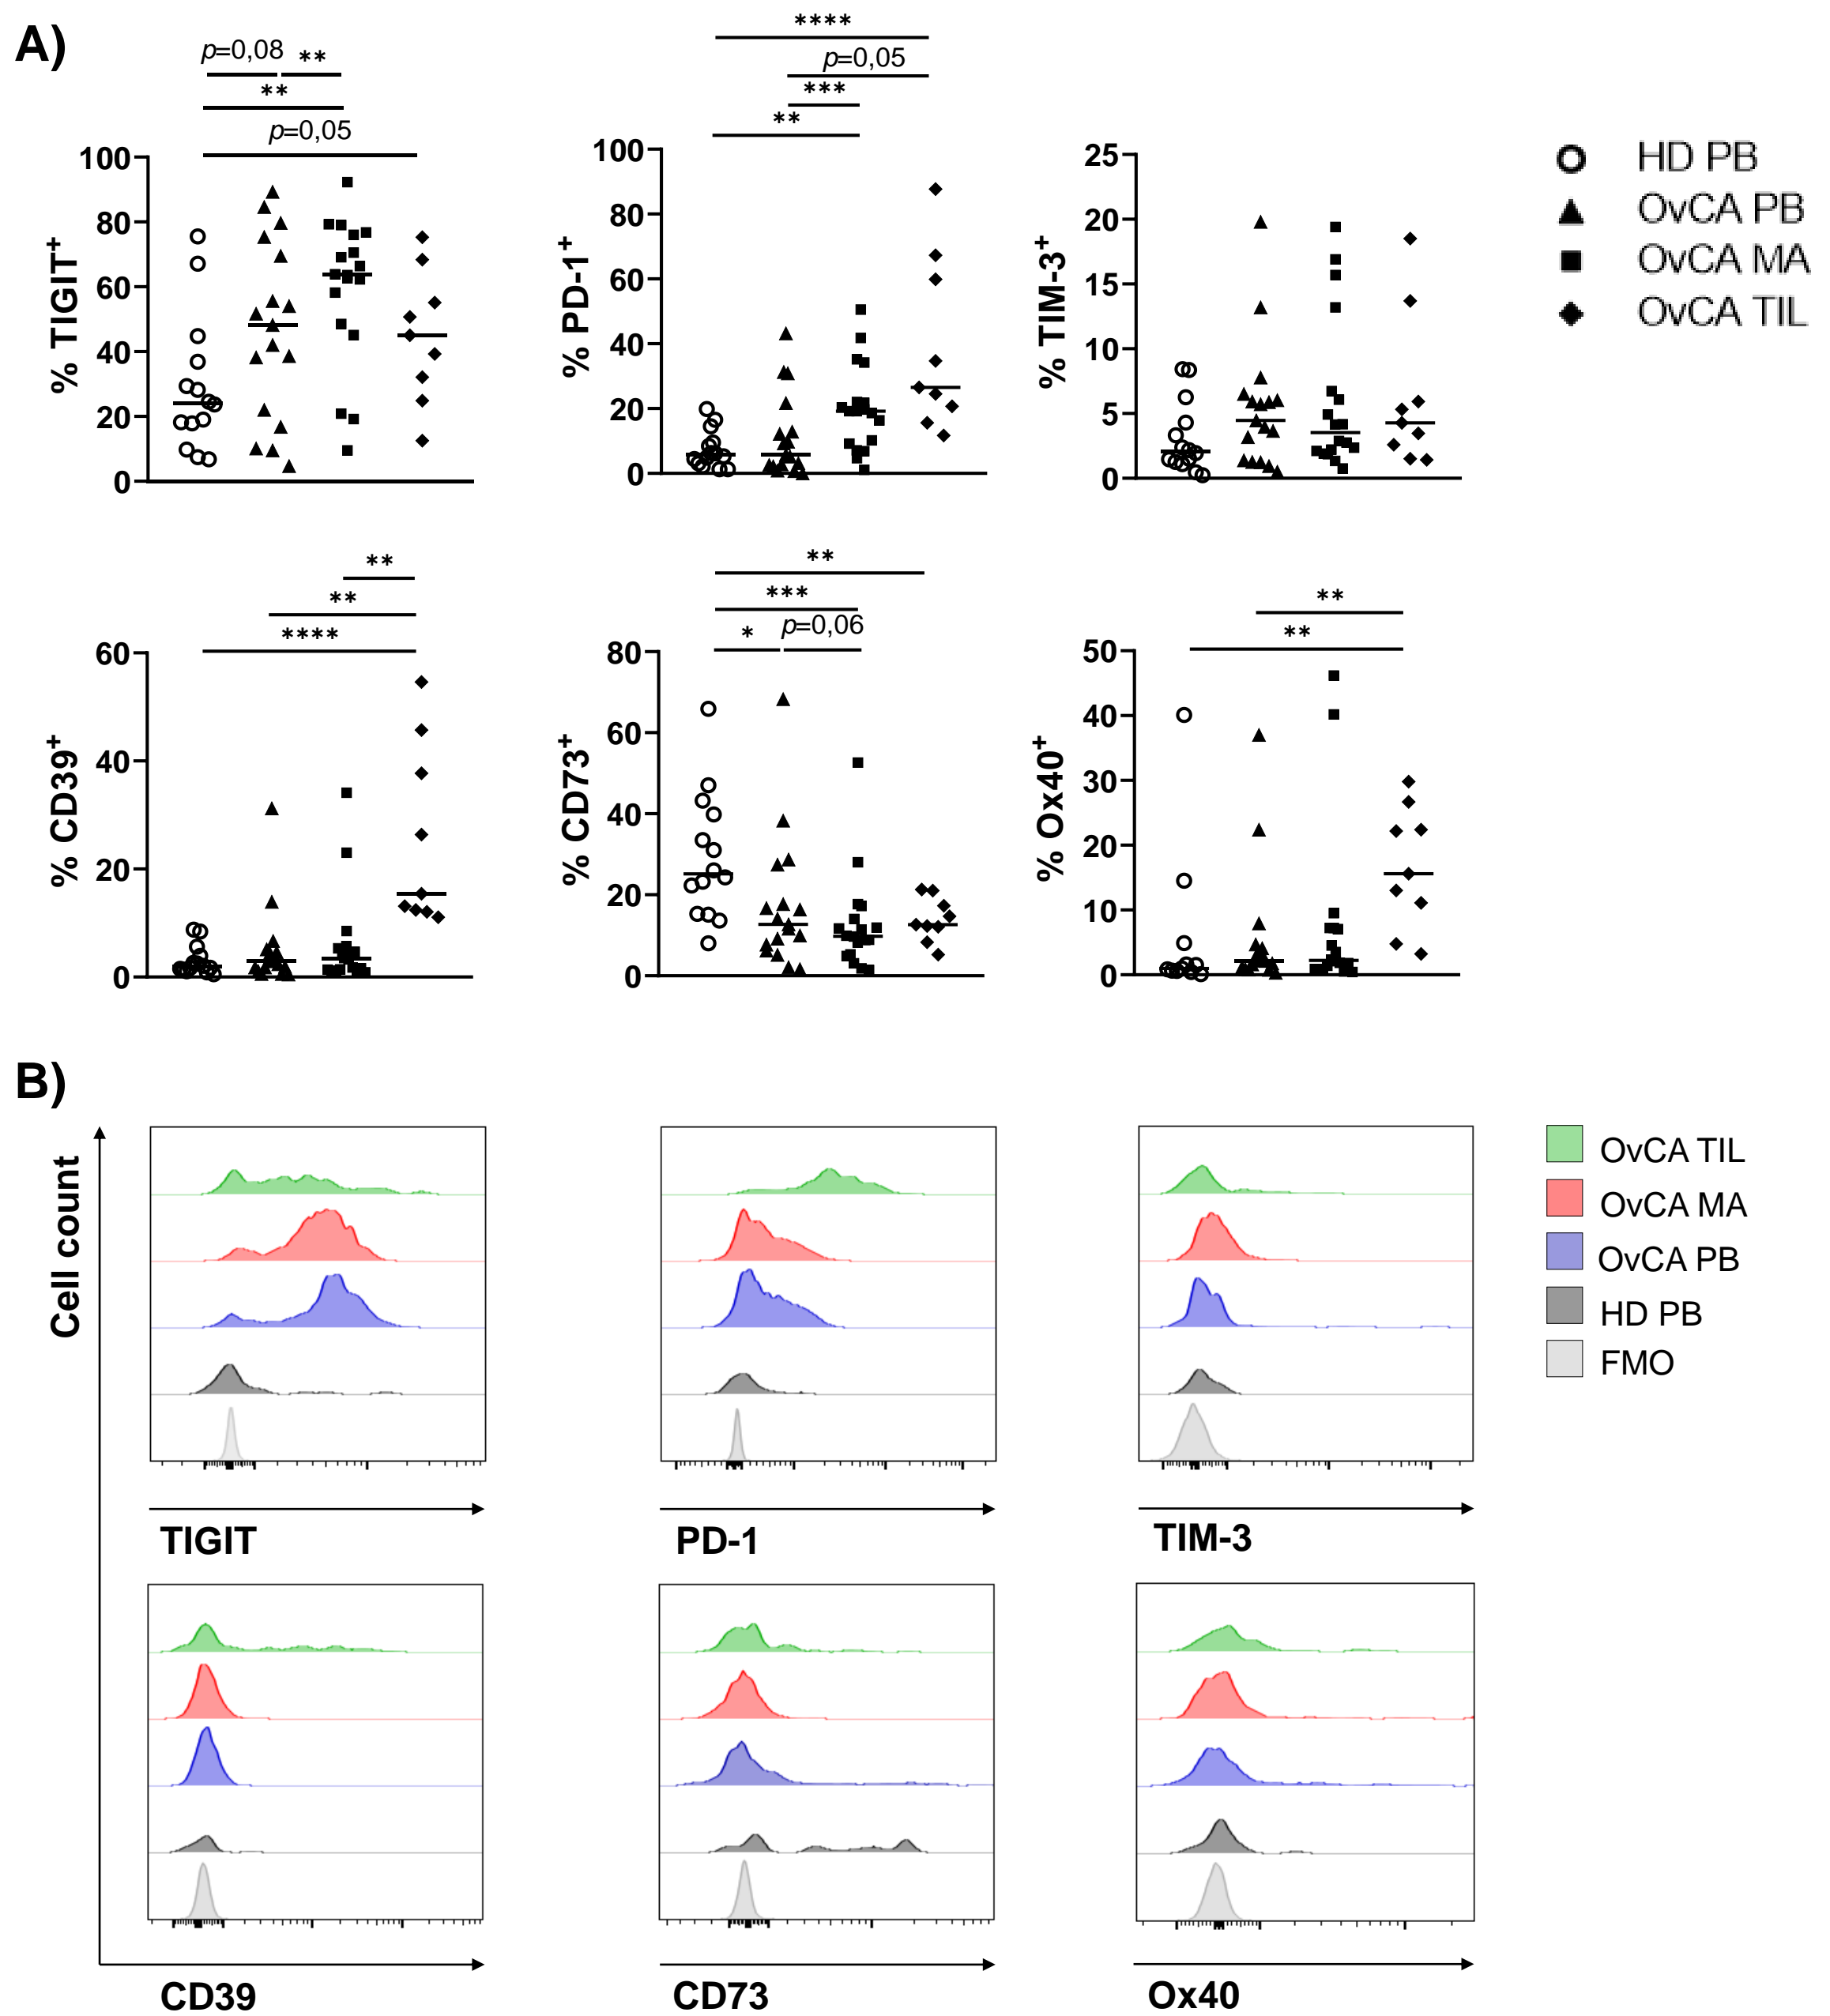

**Figure S4: Expression of co-inhibitory receptors, ectonucleotidases and activation markers on  $\gamma\delta$  T cells.**

The expression of TIGIT, PD-1, TIM-3, CD39, CD73 and Ox40 was compared on  $\gamma\delta$  T cells. **(A)** Summary data show the frequency of positive cells within the peripheral blood (PB) from healthy donors (HD, white circles,  $n=14$ ), and PB (triangles,  $n=17$ ), malignant ascites (MA, squares,  $n=18$ ), and tumor-infiltrating lymphocytes (TILs, diamonds,  $n=9$ ) of ovarian cancer (OvCA) patients.  $P$  values were obtained by the Wilcoxon matched-pairs signed-rank test and by the Mann-Whitney-Test. \* $P<0.05$ , \*\* $P<0.01$ , \*\*\* $P<0.001$ , \*\*\*\* $P<0.0001$ . **(B)** Histograms show the median fluorescence intensity of the analyzed molecules in the respective compartments vs. FMO control.

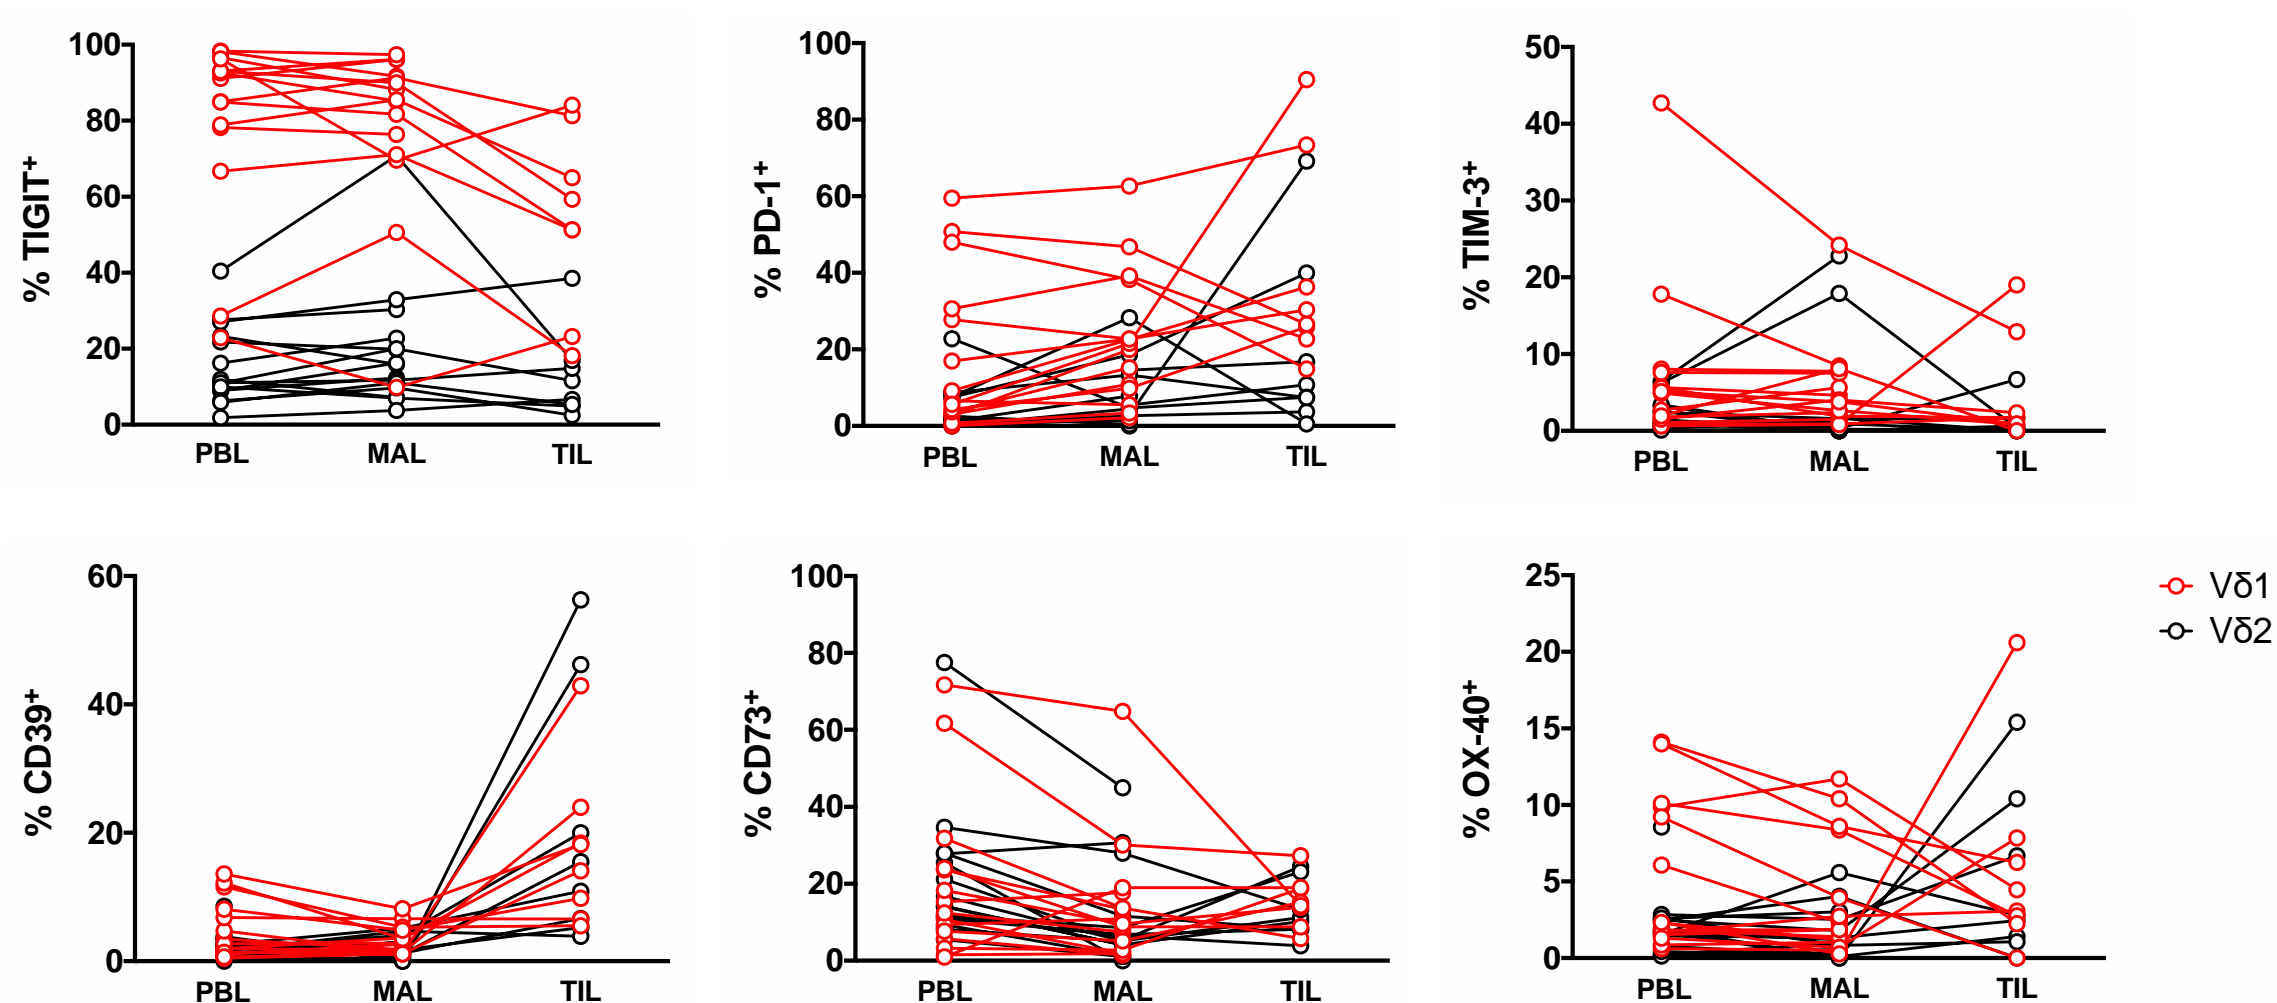

**Figure S5: Expression of co-inhibitory receptors, ectonucleotidases and activation markers on Vδ1 and Vδ2 T cells.**

The expression of PD-1, TIM-3, CD39, CD73 and Ox40 was compared on Vδ1 (red) and Vδ2 (black) T cells within 8 triple matched samples: peripheral blood (PB, triangles), malignant ascites (MA, squares), and tumor infiltrating-lymphocytes (TIL, diamonds) and within 7 double matched specimens (PB and MA) of ovarian cancer (OvCA) patients. The connecting lines indicate the expression in the different tissues from one patient. *P* values were obtained by the Wilcoxon matched-pairs signed-rank test. \**P*<0.05, \*\**P*<0.01, \*\*\**P*<0.001, \*\*\*\**P*<0.0001.

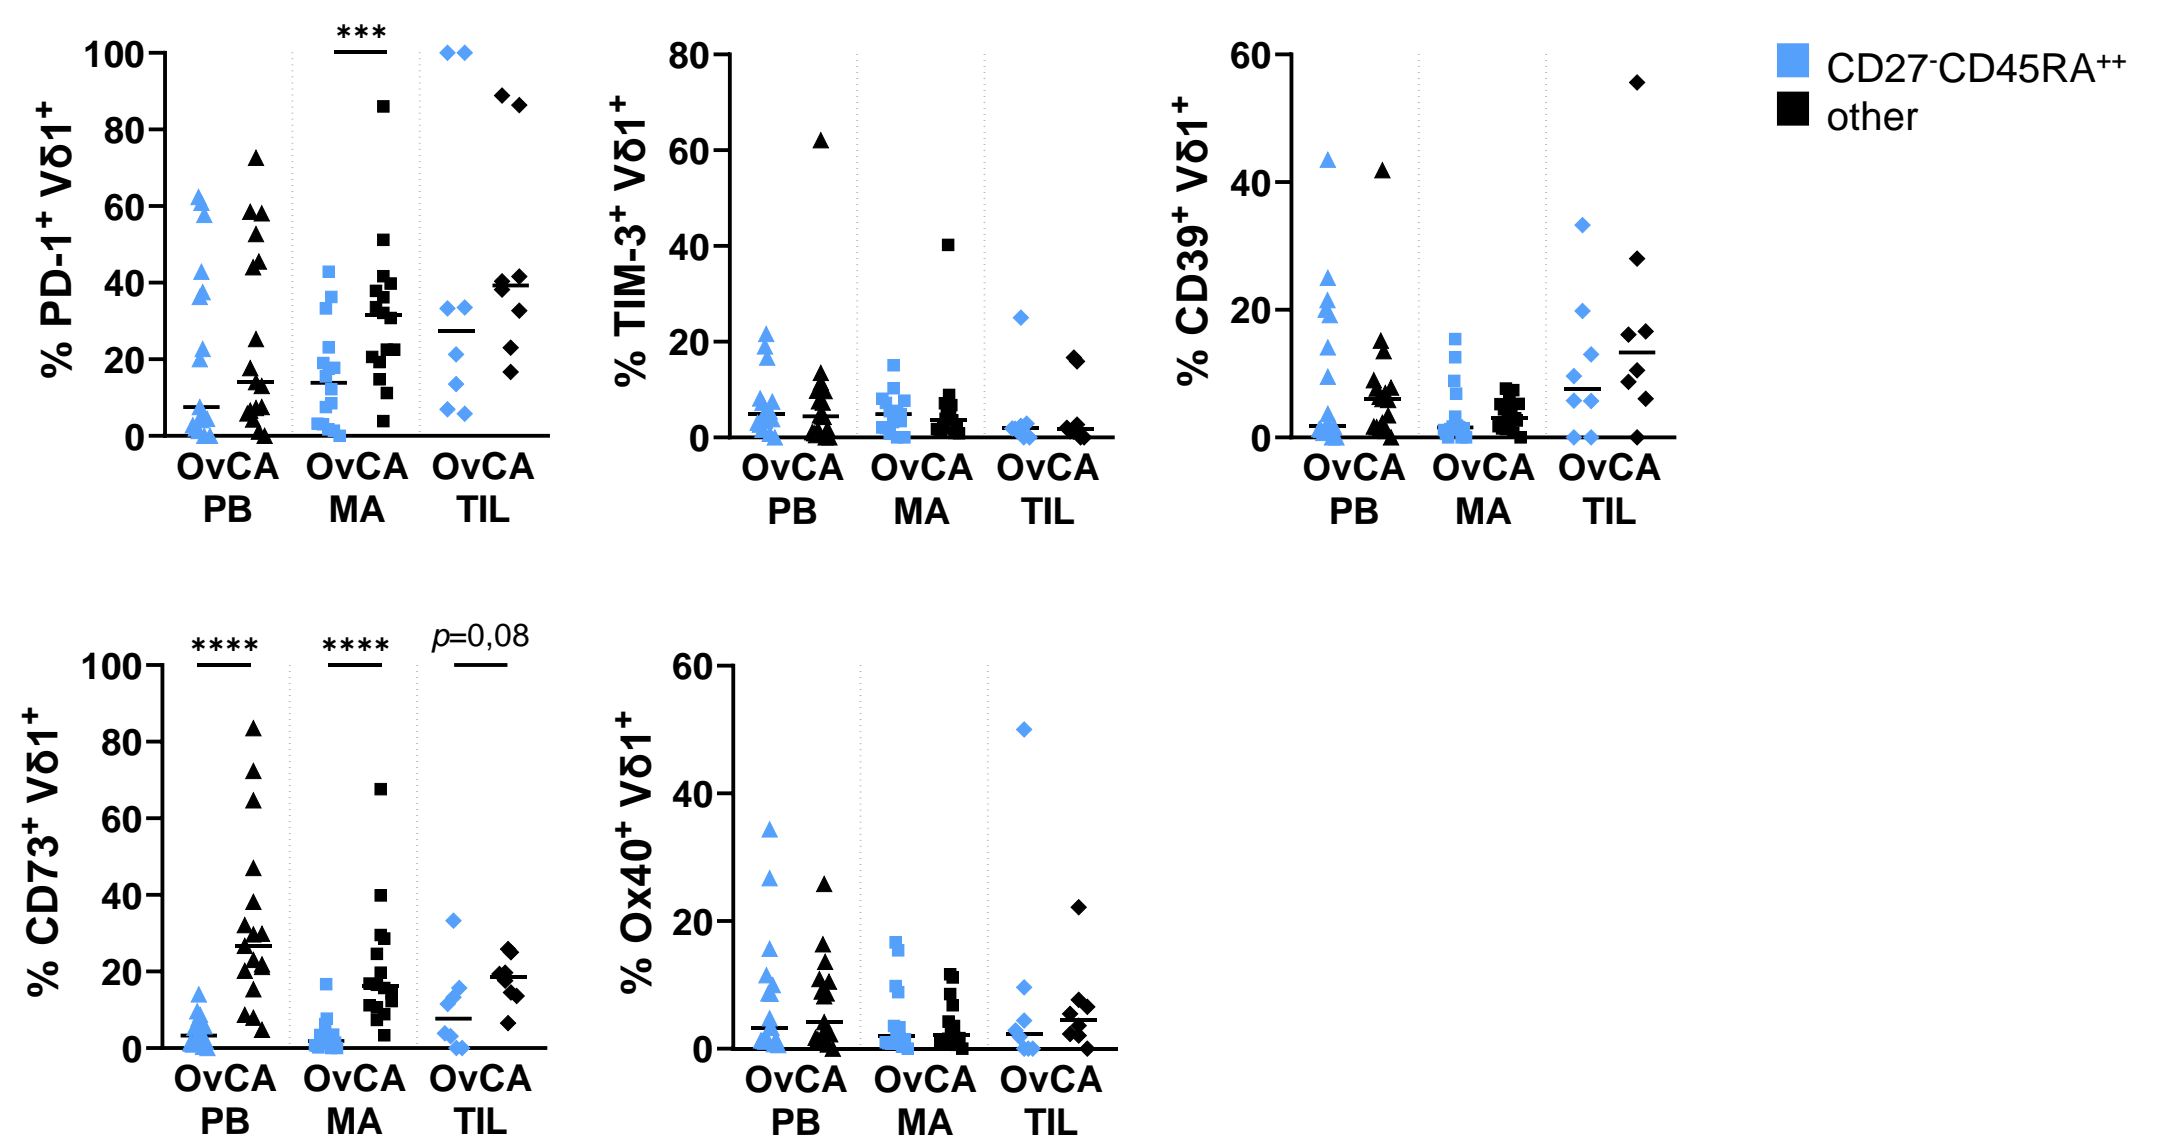

**Figure S6: Expression of co-inhibitory receptors, ectonucleotidases and activation markers on Vδ1 CD27-CD45RA<sup>high</sup> T cells.**

The expression of PD-1, TIM-3, CD39, CD73 and Ox40 was compared between subsets of Vδ1 T cells in peripheral blood (PB, triangles, n=17), malignant ascites (MA, squares, n=16), and tumor-infiltrating lymphocytes (TILs, diamonds, n=8) of ovarian cancer (OvCA) patients. Summary data show the expression of the markers on CD27-CD45RA<sup>high</sup> cells (light blue) vs. all other differentiation stages (black). *P* values were obtained by the Wilcoxon matched-pairs signed-rank test. \**P*<0.05, \*\**P*<0.01, \*\*\**P*<0.001, \*\*\*\**P*<0.0001.



A) Vδ1 NAIVE

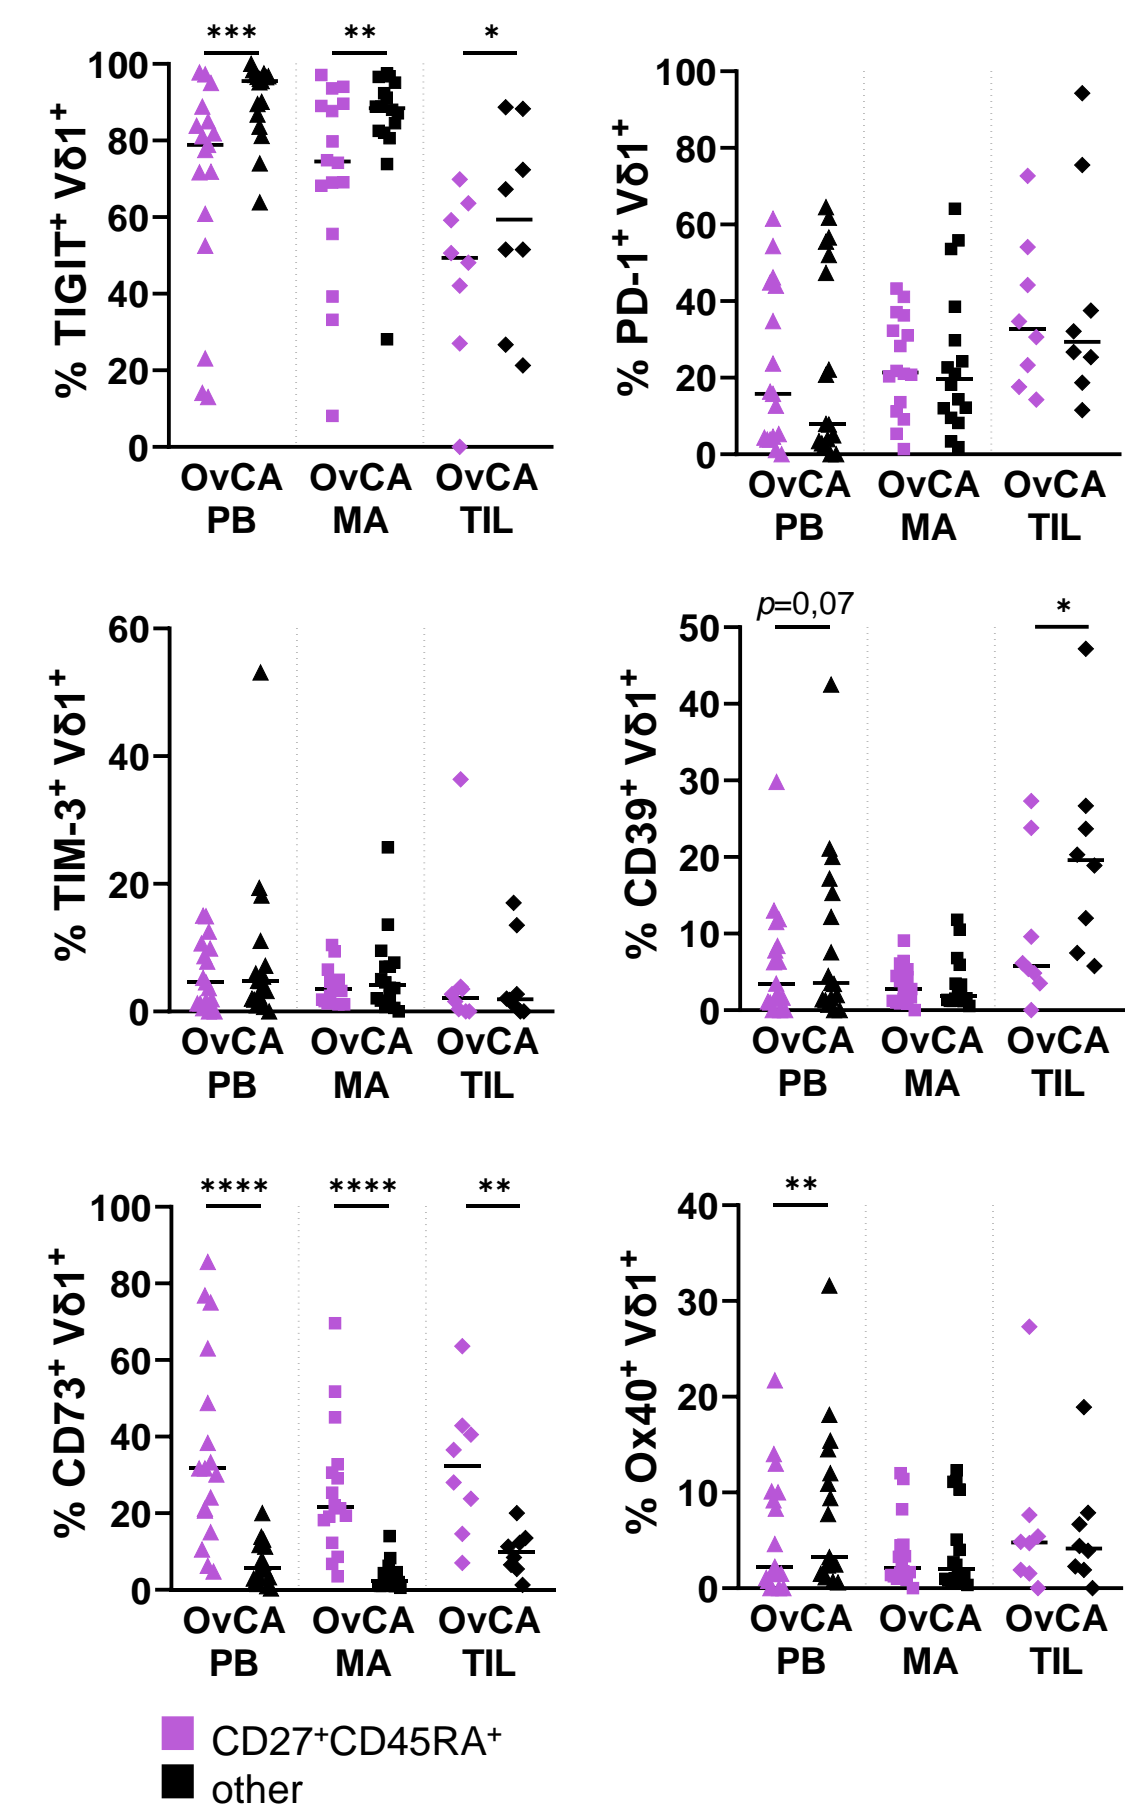

B) Vδ1 CENTRAL MEMORY

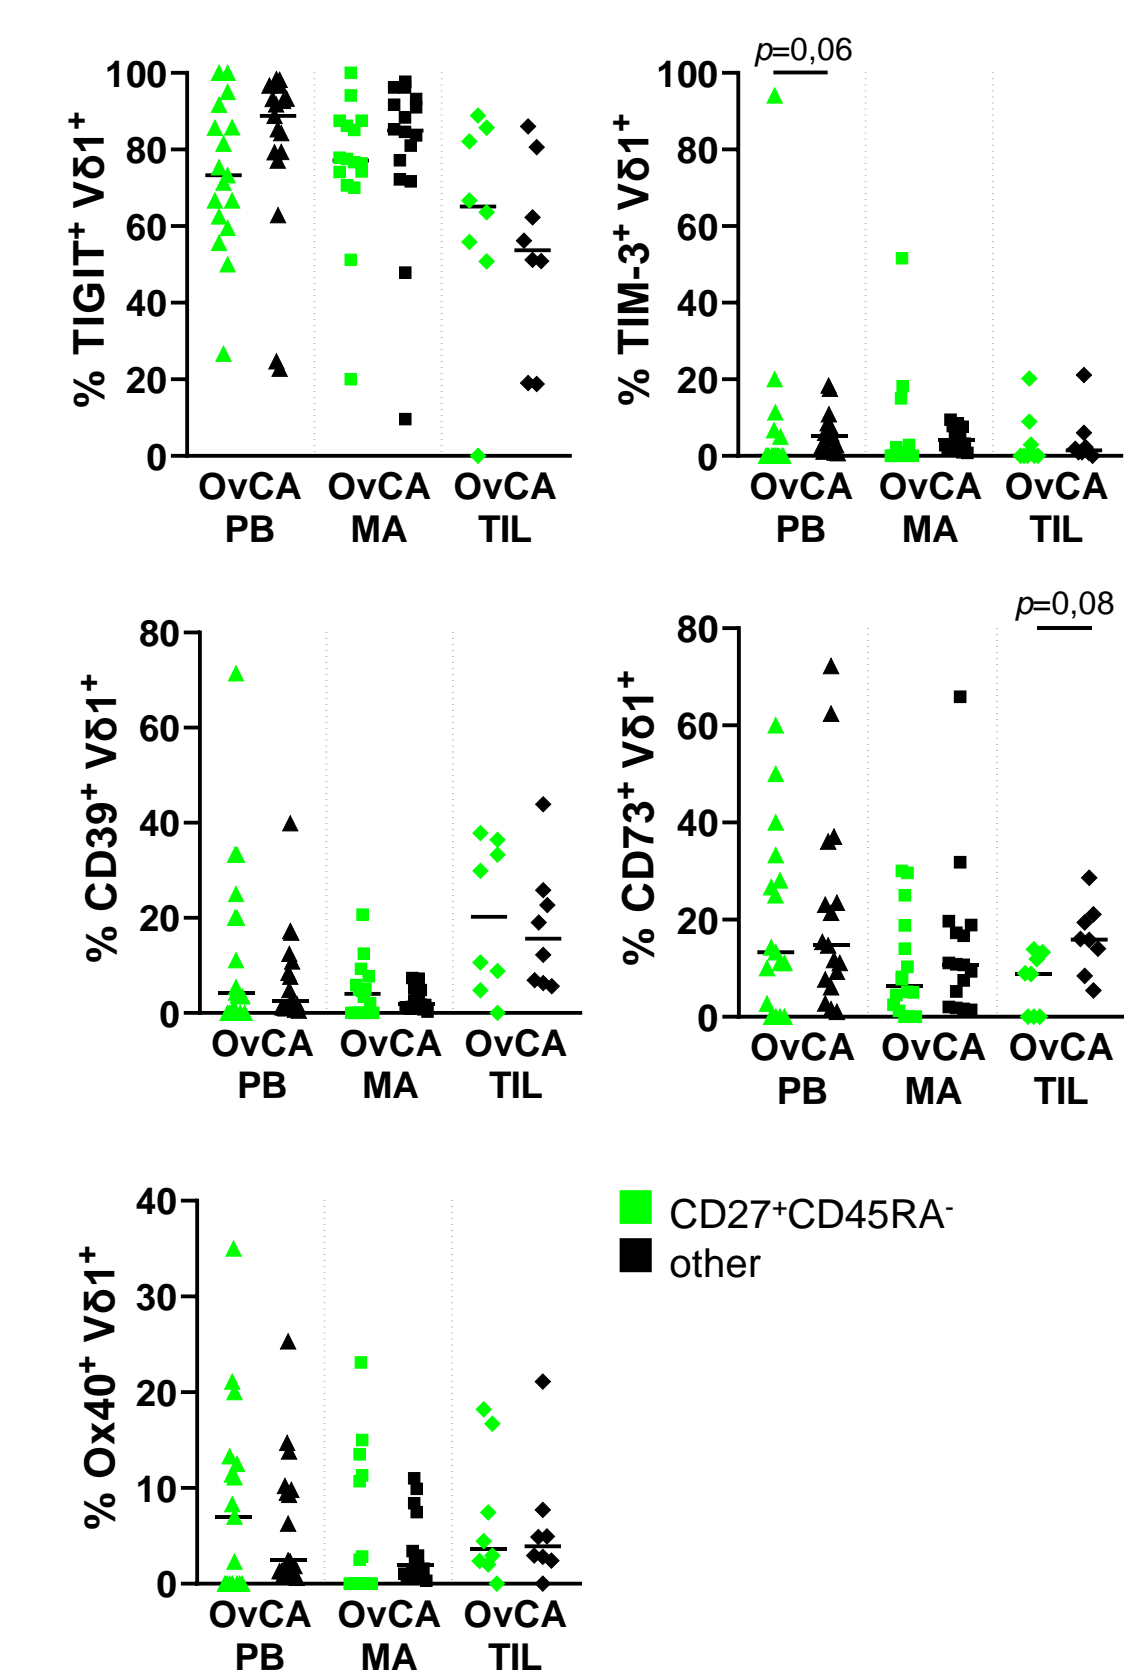

C) Vδ1 EFFECTOR MEMORY

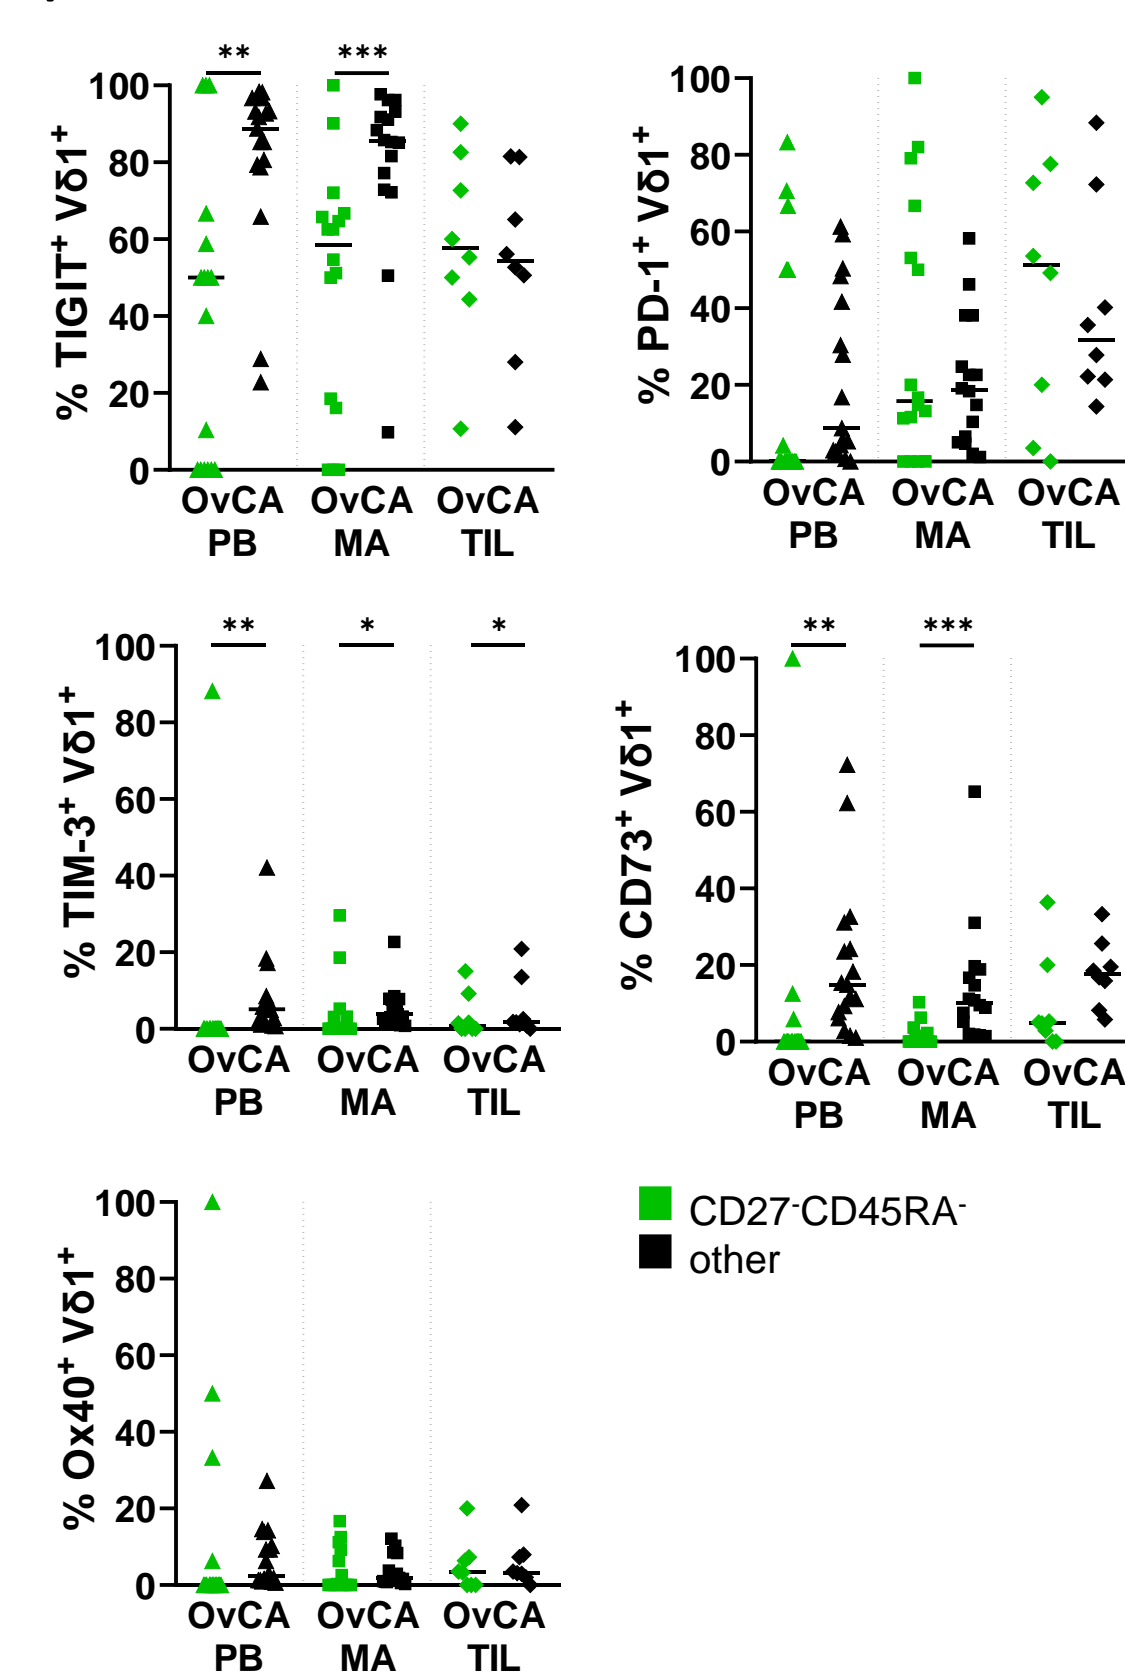

D) Vδ1 TERMINALLY DIFFERENTIATED

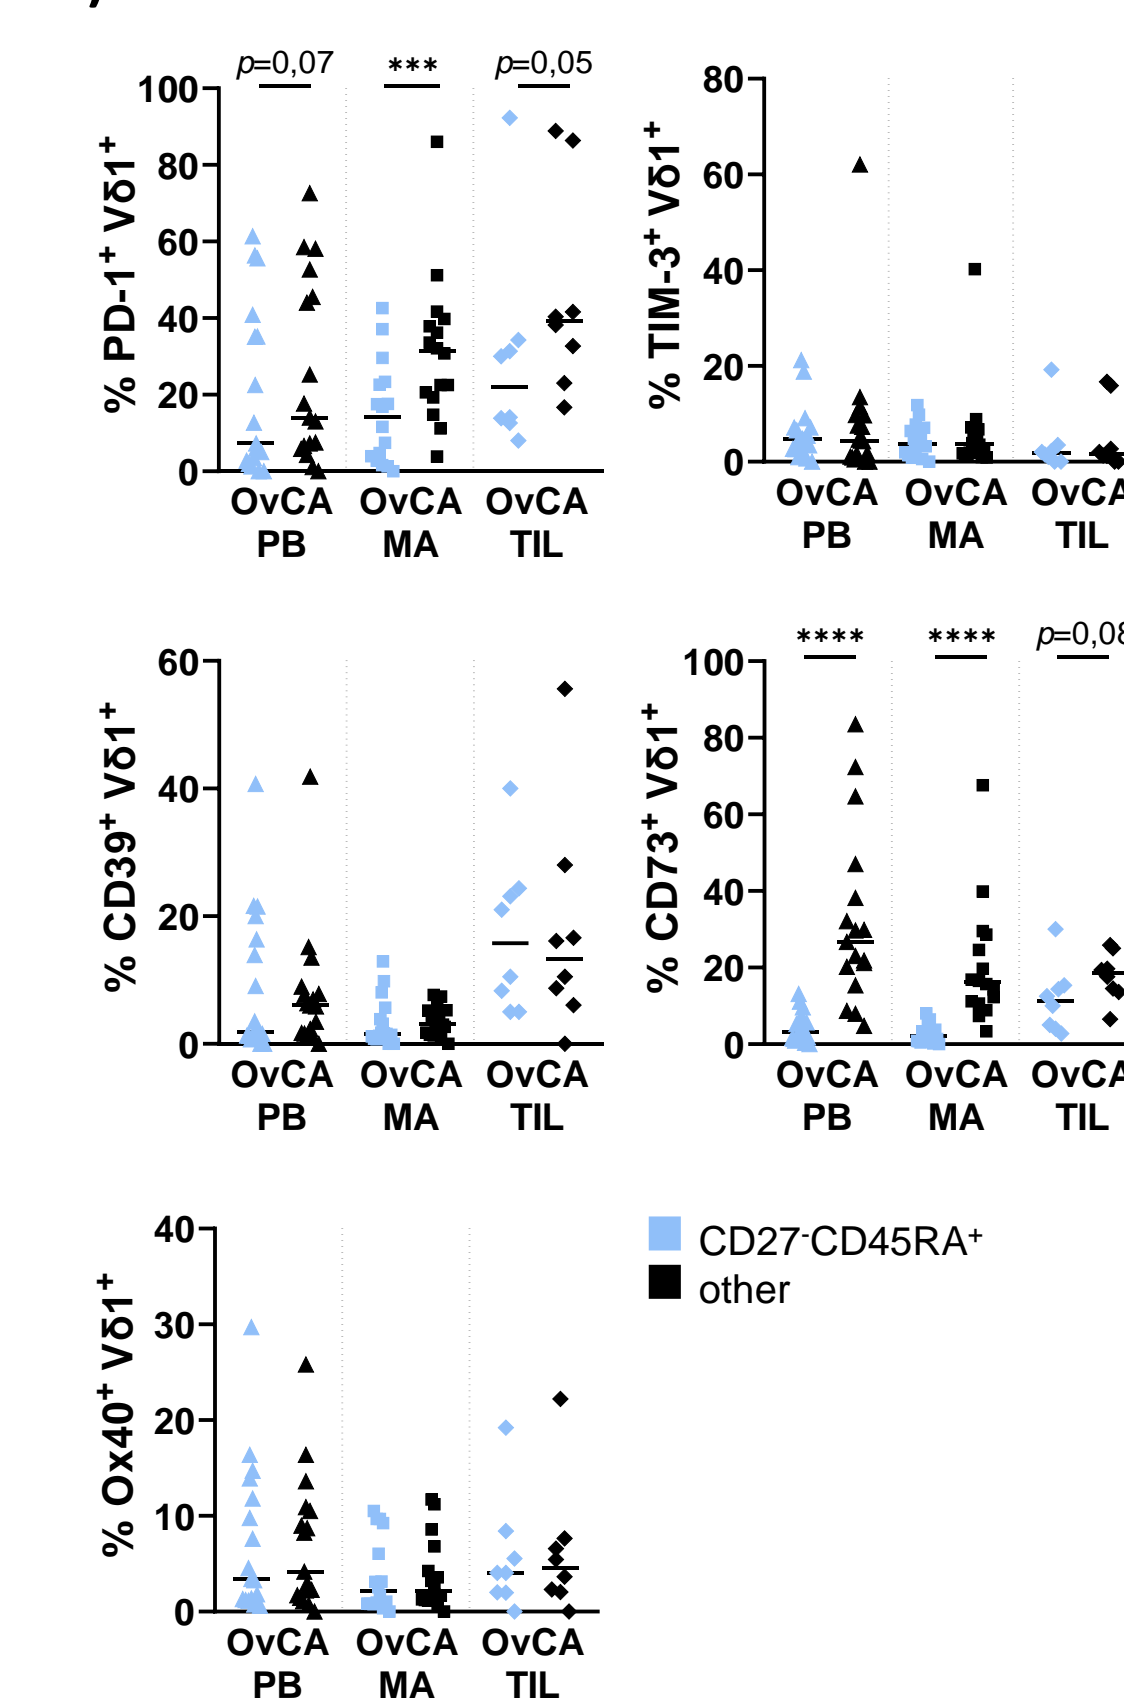

**Figure S7: Expression of co-inhibitory receptors, ectonucleotidases and activation markers on Vδ1 differentiation stages.**  
The expression of TIGIT, PD-1, TIM-3, CD39, CD73 and Ox40 was compared between subsets of Vδ1 T cells in peripheral blood (PB, triangles, n=17), malignant ascites (MA, squares, n=16), and tumor-infiltrating lymphocytes (TILs, diamonds, n=8) of ovarian cancer (OvCA) patients. Summary data show the expression of the markers on **(A)** naïve (purple), **(B)** central memory (light green), **(C)** effector memory (dark green), and **(D)** terminally differentiated (blue) cells vs. all other respective differentiation stages (black). *P* values were obtained by the Wilcoxon matched-pairs signed-rank test. \**P*<0.05, \*\**P*<0.01, \*\*\**P*<0.001, \*\*\*\**P*<0.0001.

A) Vδ2 NAIVE

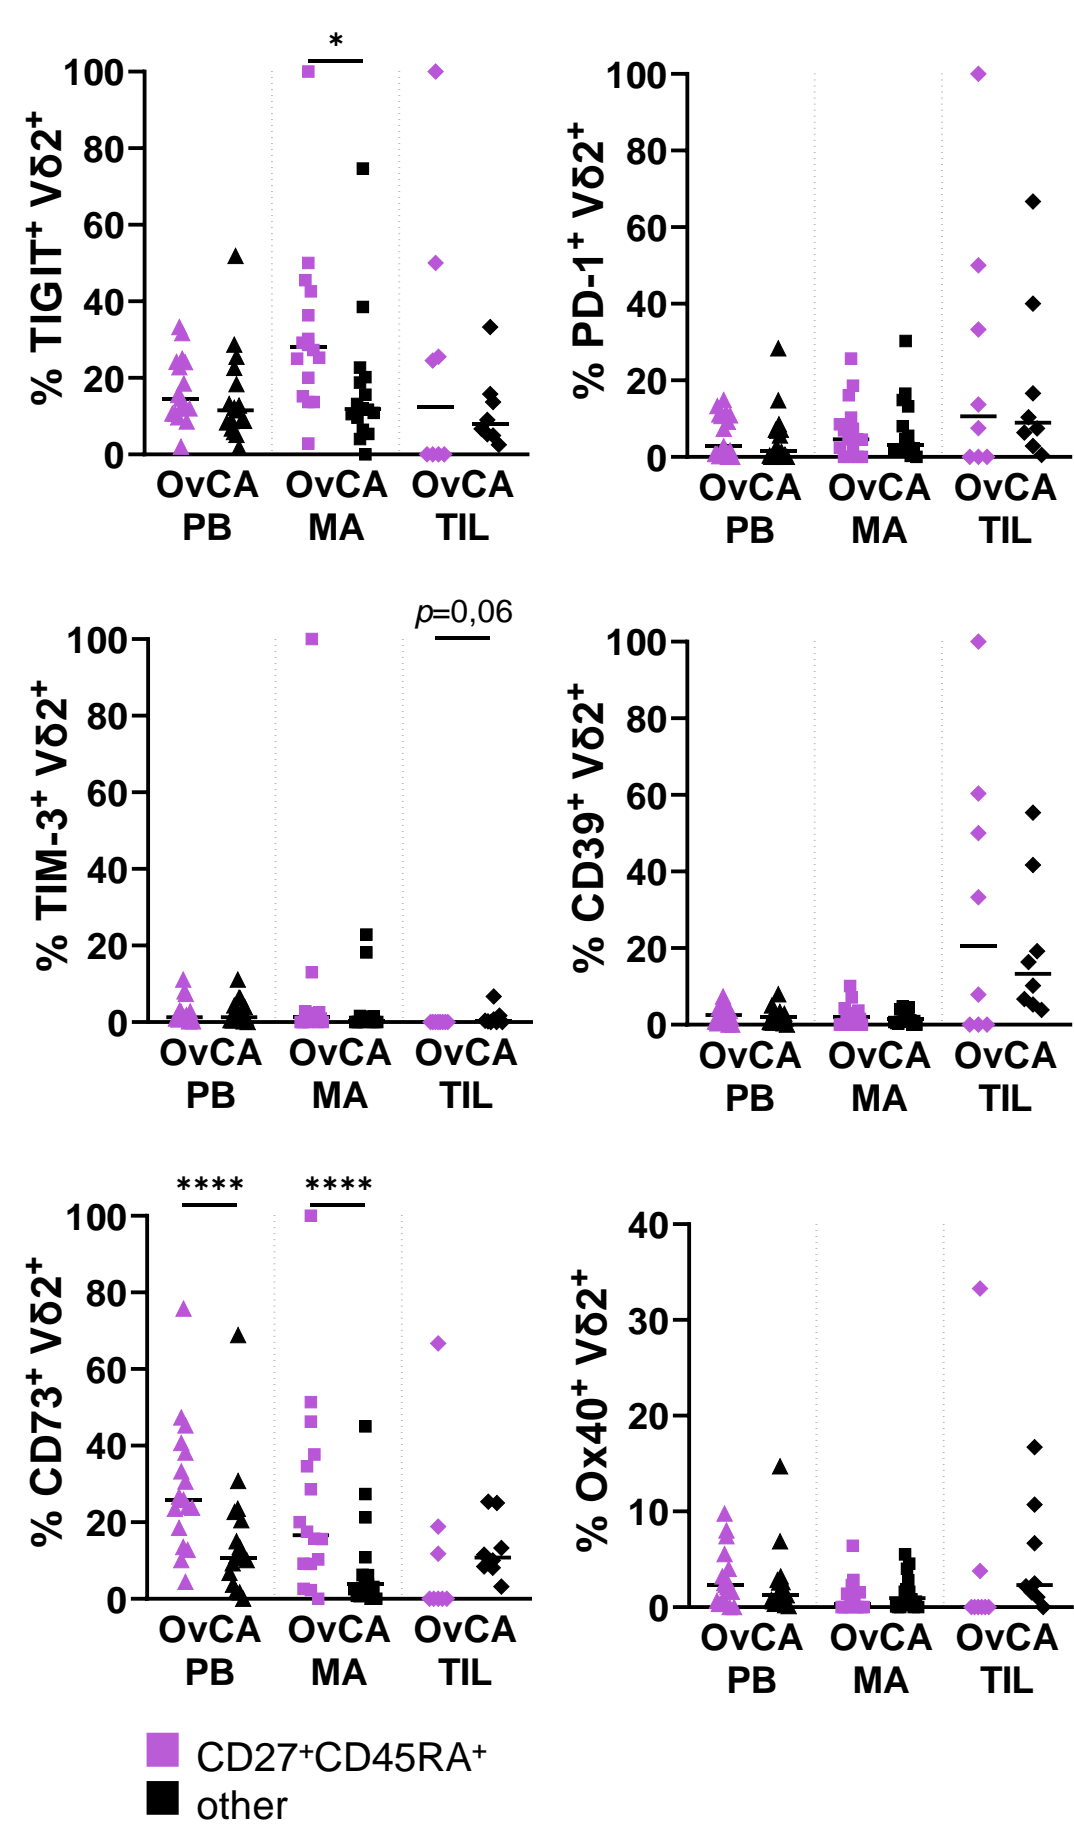

B) Vδ2 CENTRAL MEMORY

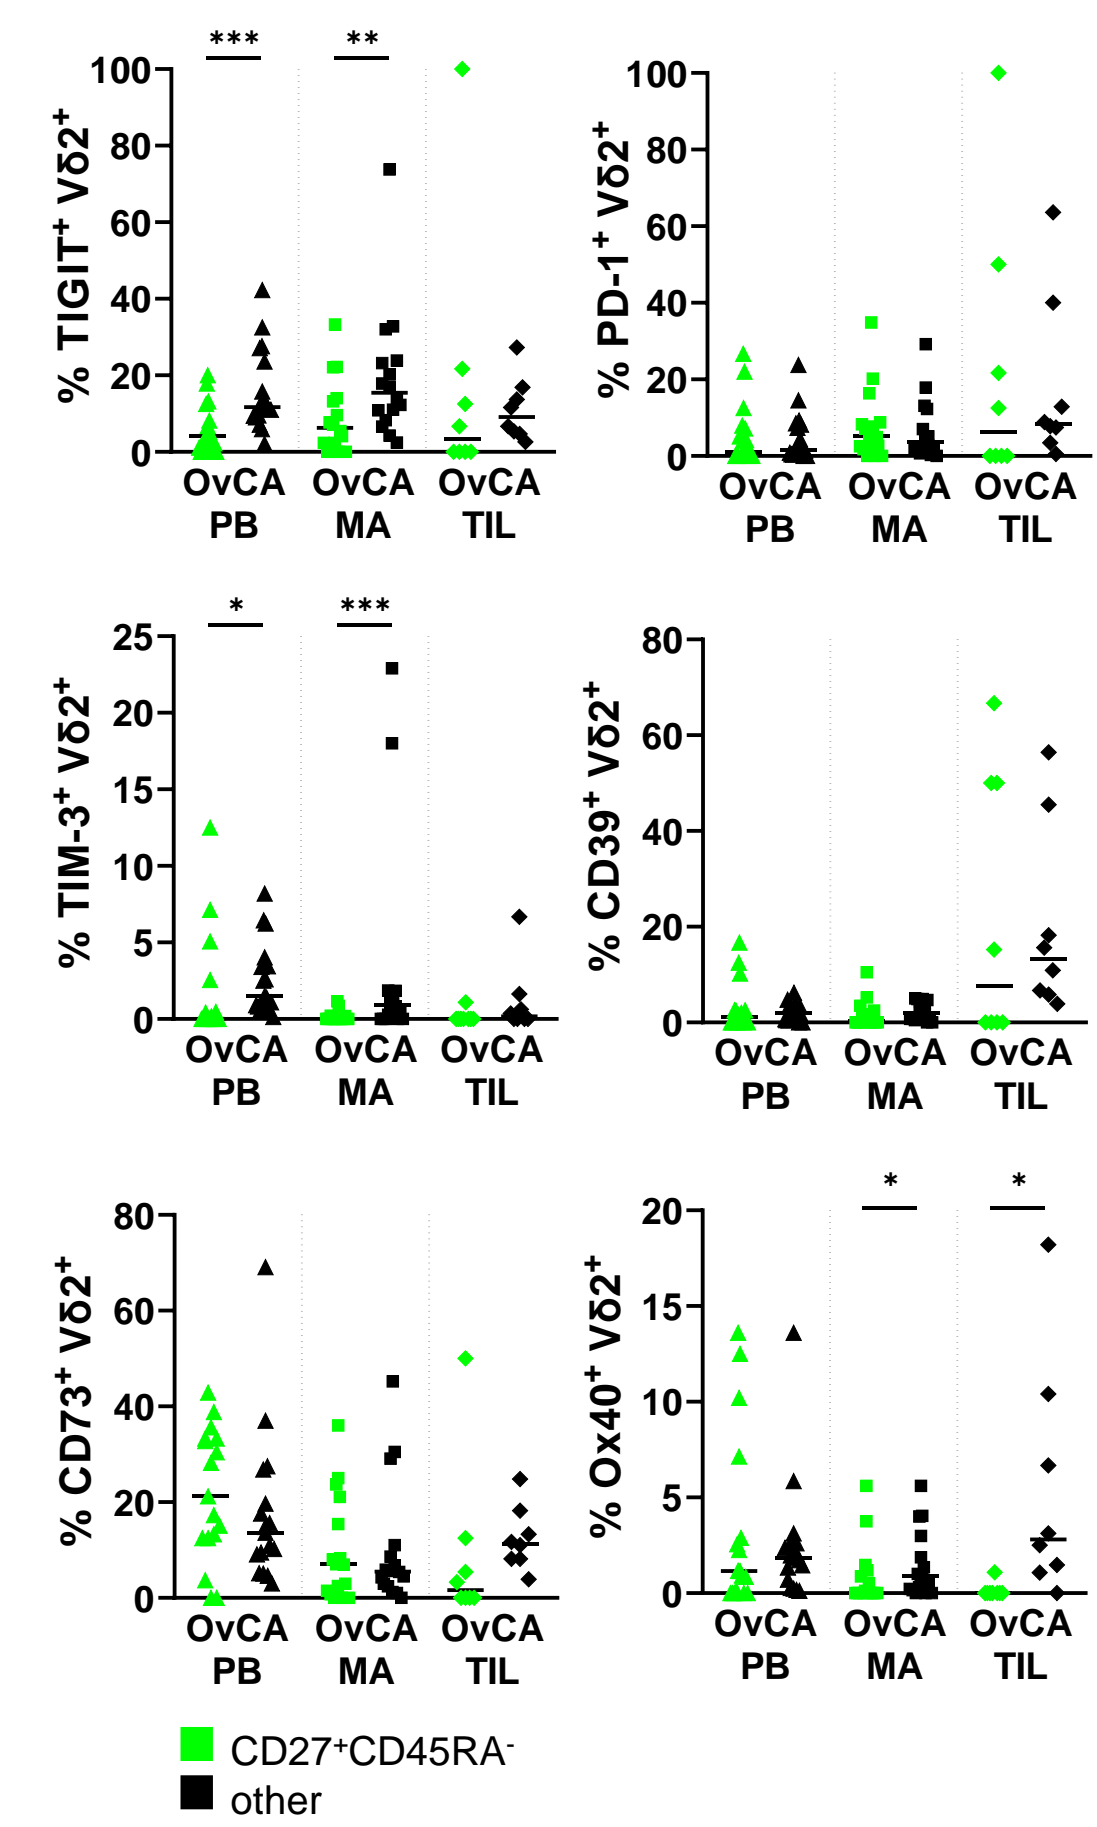

C) Vδ2 EFFECTOR MEMORY

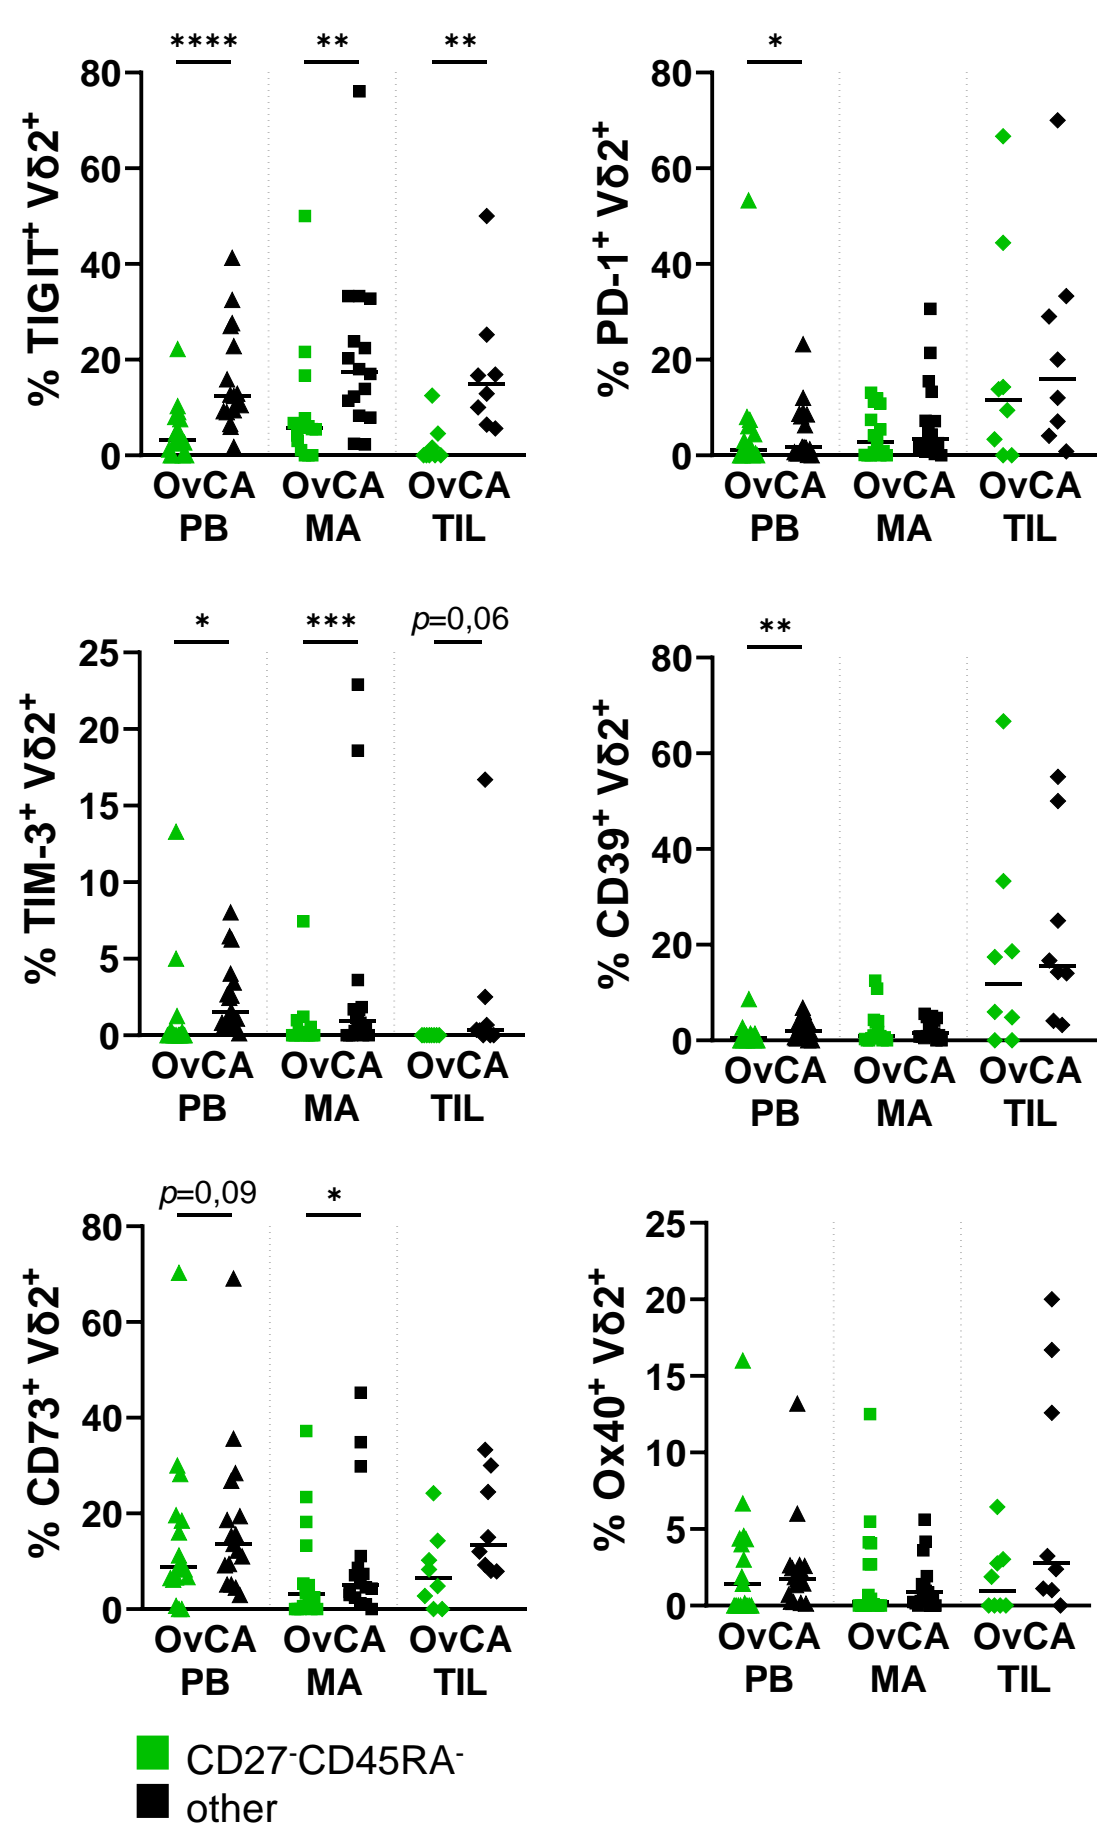

D) Vδ2 TERMINALLY DIFFERENTIATED

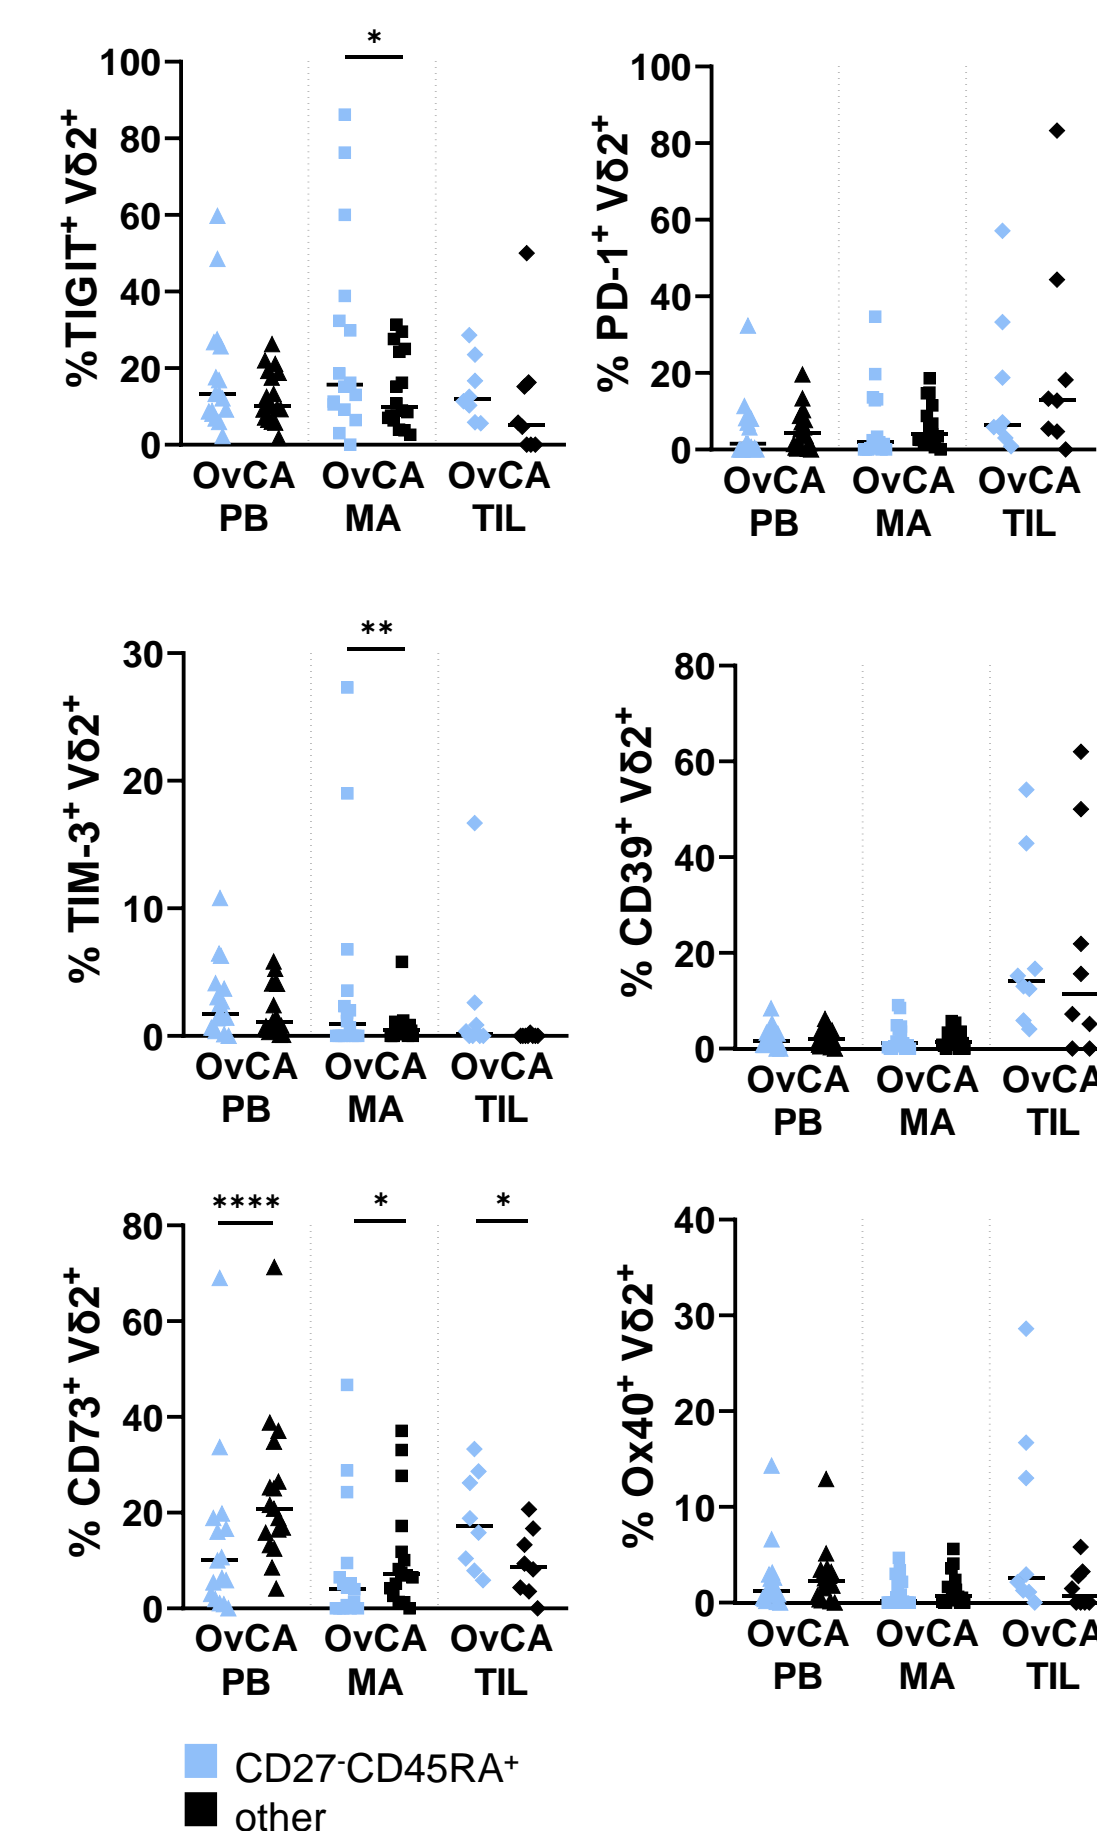

**Figure S8: Expression of co-inhibitory receptors, ectonucleotidases and activation markers on Vδ2 differentiation stages.**  
The expression of TIGIT, PD-1, TIM-3, CD39, CD73 and Ox40 was compared between subsets of Vδ2 T cells in peripheral blood (PB, triangles, n=17), malignant ascites (MA, squares, n=16), and tumor-infiltrating lymphocytes (TILs, diamonds, n=8) of ovarian cancer (OvCA) patients. Summary data show the expression of the markers on (A) naïve (purple), (B) central memory (light green), (C) effector memory (dark green), and (D) terminally differentiated (blue) cells vs. all other respective differentiation stages (black). *P* values were obtained by the Wilcoxon matched-pairs signed-rank test. \**P*<0.05, \*\**P*<0.01, \*\*\**P*<0.001, \*\*\*\**P*<0.0001.

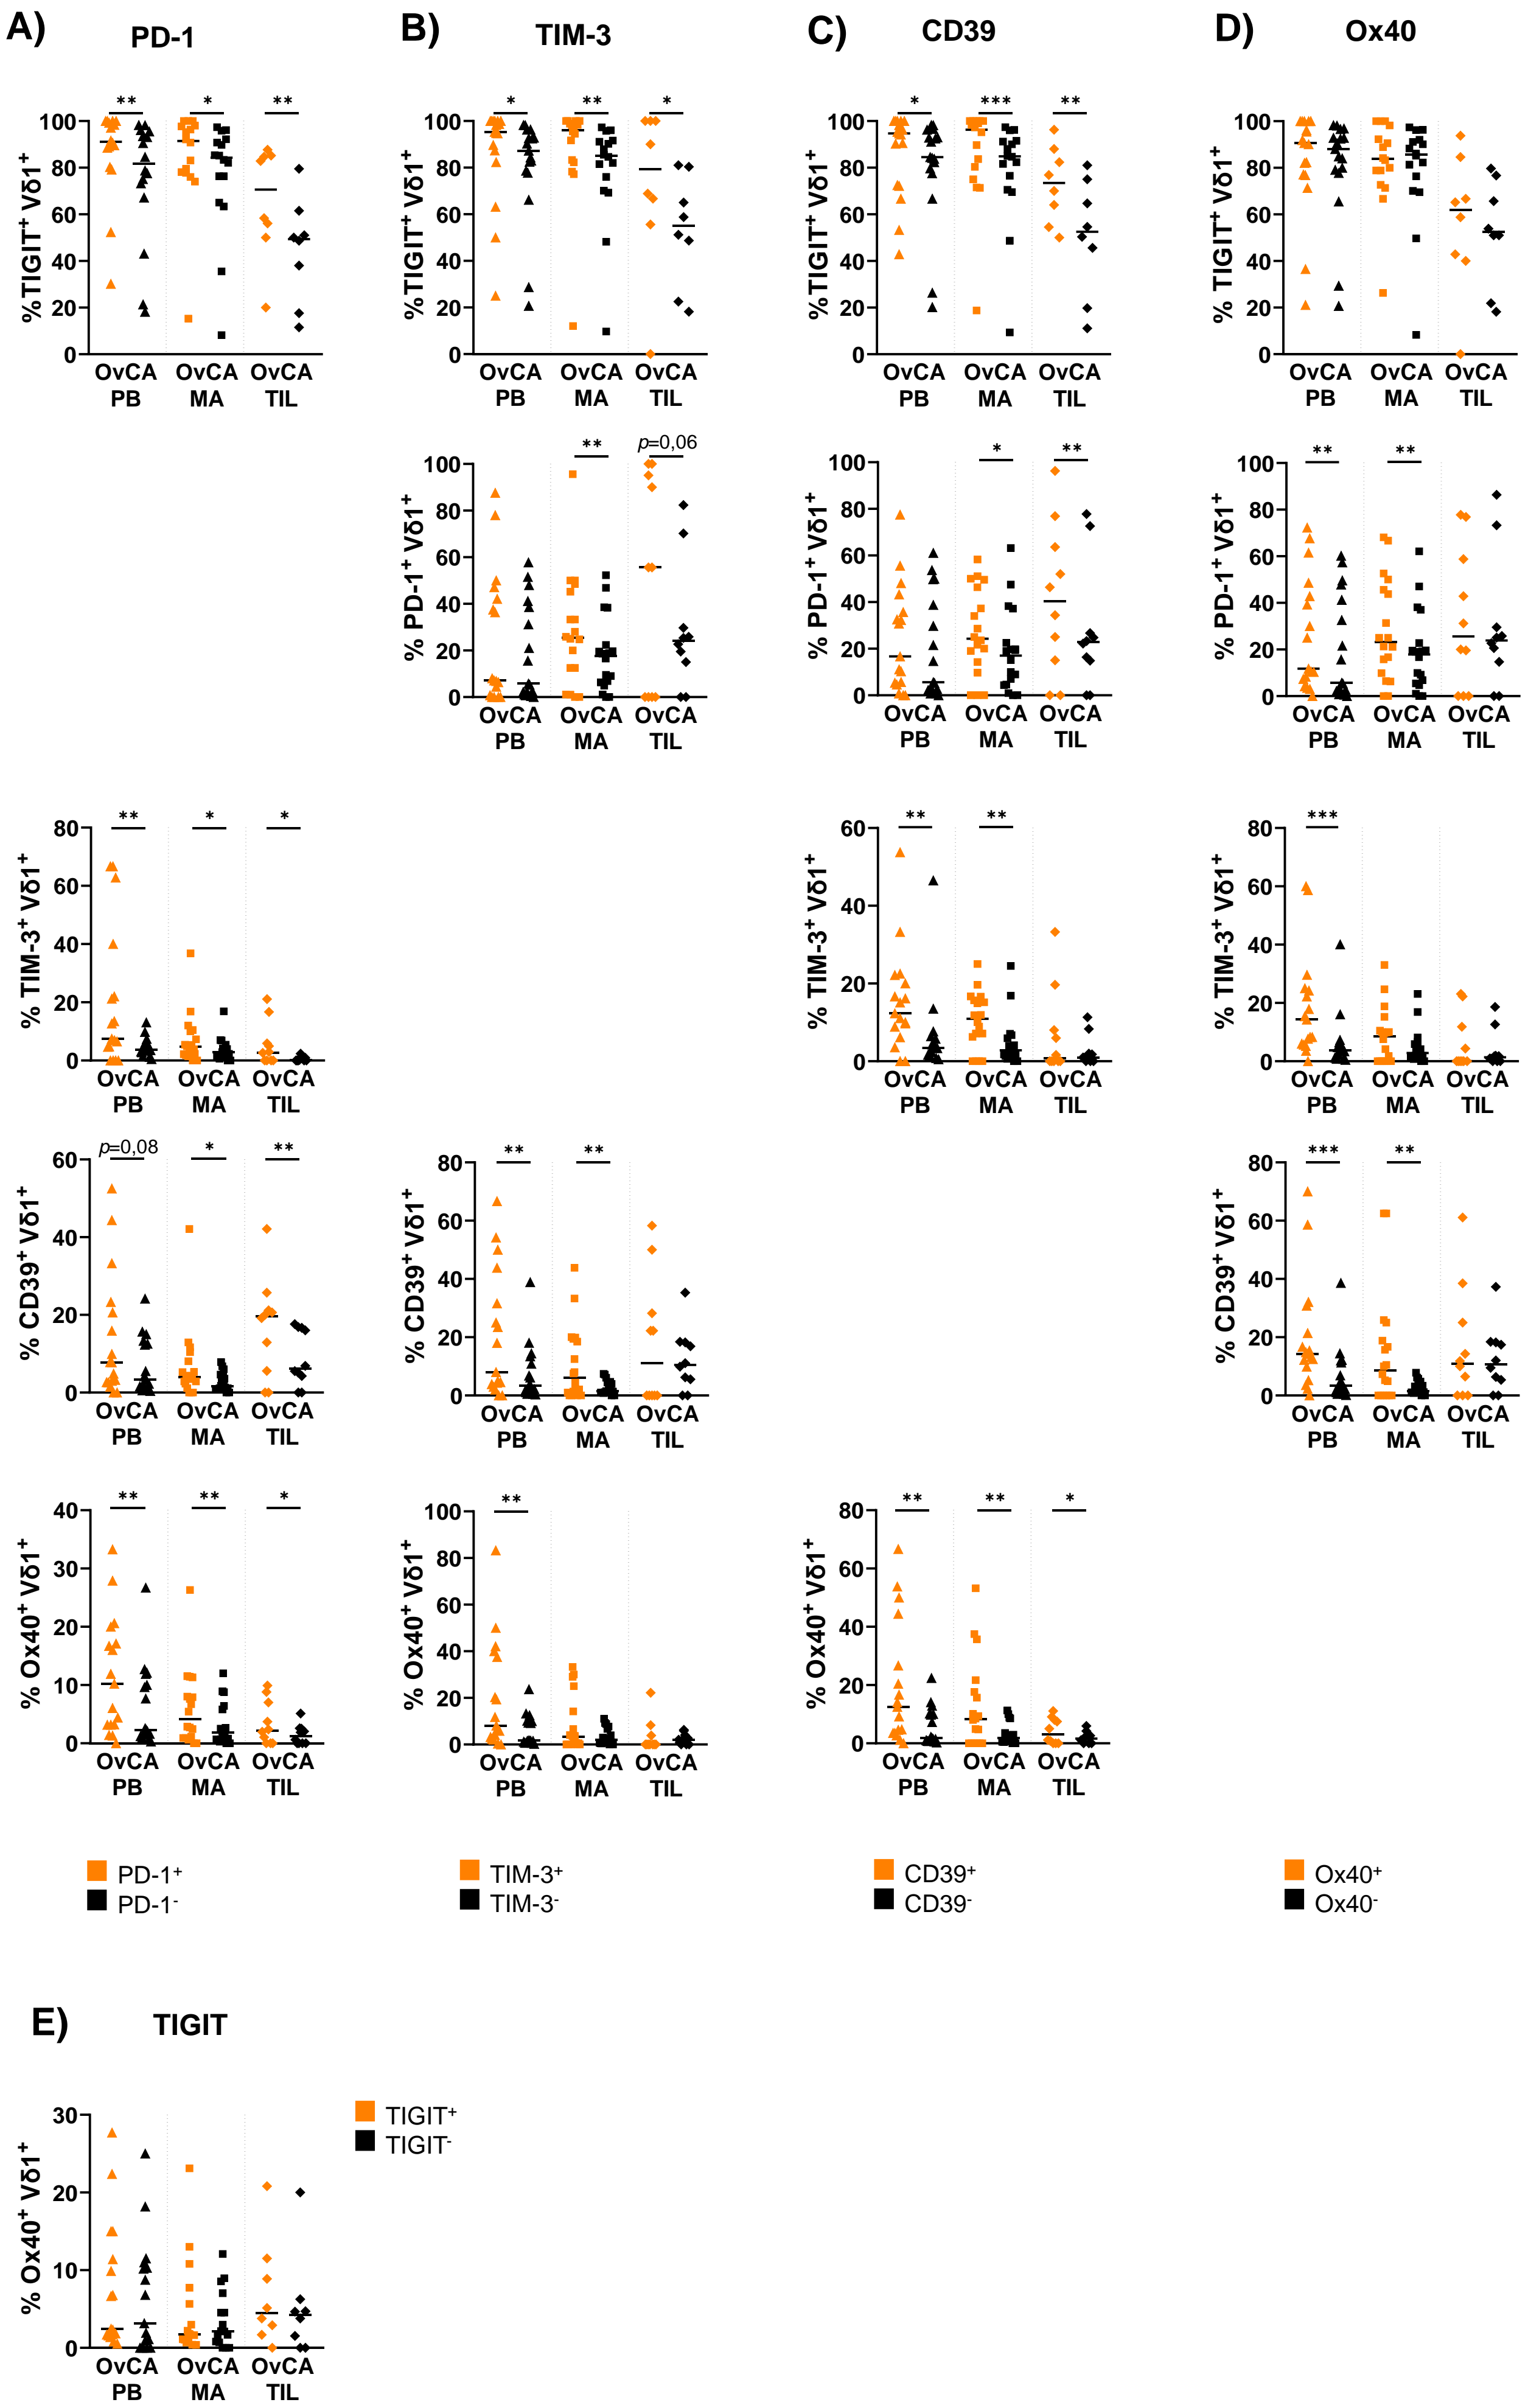

**Figure S9: Co-expression of co-inhibitory receptors, ectonucleotidases and activation markers on Vδ1 T cells.**

The co-expression of TIGIT, PD-1, TIM-3, CD39, CD73 and Ox40 was compared on Vδ1 T cells in peripheral blood (PB, triangles, n=17), malignant ascites (MA, squares, n=16), and tumor-infiltrating lymphocytes (TILs, diamonds, n=8) of ovarian cancer (OvCA) patients. Summary data show the expression of the respective markers on **(A)** PD-1<sup>+</sup>, **(B)** TIM-3<sup>+</sup>, **(C)** CD-39<sup>+</sup>, and **(D)** Ox40<sup>+</sup> **(E)** TIGIT<sup>+</sup> cells (orange) vs. the cells not expressing the underlying molecules (black). *P* values were obtained by the Wilcoxon matched-pairs signed-rank test. \**P*<0.05, \*\**P*<0.01, \*\*\**P*<0.001, \*\*\*\**P*<0.0001.
